# Supplementary material for: Characterization of AAV-mediated dorsal root ganglionopathy
Source: PubMed Central journal article supplement — Mol Ther Methods Clin Dev. 2022 Feb 1;24:342–54. doi: 10.1016/j.omtm.2022.01.013 (PMC8851102; doi:10.1016/j.omtm.2022.01.013), 2022-02-01
Supplement: mmc1.pdf [file mmc1.pdf]

**OMTM, Volume 24**

## **Supplemental information**

### **Characterization of AAV-mediated dorsal root ganglionopathy**

**Nicholas Buss, Lisa Lanigan, Jillynne Zeller, Derek Cissell, Monica Metea, Eric Adams, Mikayla Higgins, Kwi Hye Kim, Ewa Budzynski, Lin Yang, Ye Liu, Mark Butt, Olivier Danos, and Michele Fiscella**

**Table S1: Test article release data**

| Vector                | Concentration (GC/mL) <sup>A</sup> |                      | In vitro potency <sup>B</sup> |          | Endotoxin <sup>C</sup> | Bioburden <sup>D</sup> | AAV Purity <sup>E</sup> |          |
|-----------------------|------------------------------------|----------------------|-------------------------------|----------|------------------------|------------------------|-------------------------|----------|
|                       | At release                         | 7 Months             | At release                    | 6 Months |                        |                        | At release              | 6 Months |
| <b>AAV9.hCLN2-CEX</b> | 3.1×10 <sup>13</sup>               | 3.0×10 <sup>13</sup> | 82%                           | 98%      | < 0.01 EU/mL           | < 10 CFU/1 mL          | 98%                     | 99%      |
| <b>AAV9.hCLN2-UC</b>  | 3.1×10 <sup>13</sup>               | 3.2×10 <sup>13</sup> | 91%                           | 103%     | < 0.01 EU/mL           | < 10 CFU/1 mL          | 98%                     | 99%      |
| <b>AAV9.hCLN2-AEX</b> | 3.1×10 <sup>13</sup>               | 3.0×10 <sup>13</sup> | 76%                           | 91%      | < 0.01 EU/mL           | < 10 CFU/1 mL          | 98%                     | 99%      |
| <b>AAV9.hCLN2-AEX</b> | 1.1×10 <sup>14</sup>               | 1.1×10 <sup>14</sup> | 75%                           | 84%      | 0.11 EU/mL             | < 10 CFU/1 mL          | 98%                     | 99%      |
| <b>AAV9.Null</b>      | 2.8×10 <sup>13</sup>               | 2.7×10 <sup>13</sup> | NA                            | NA       | 0.02 EU/mL             | < 10 CFU/1 mL          | 98%                     | 99%      |

A: transgene ddPCR; B: HEK293 Transduction followed by TPP1 enzymatic activity assay; C: Endosafe; D: USP <61> Membrane Filtration; E: SDS-CGE.

**Table S2: Summary Incidence of Histopathology**

| Vector                                               | Control | AAV9.hCLN2-CEX       | AAV9.hCLN2-UC        | AAV9.hCLN2-AEX       | AAV9.hCLN2-AEX       | Null                 |
|------------------------------------------------------|---------|----------------------|----------------------|----------------------|----------------------|----------------------|
| Dose (GC/animal)                                     | 0       | 3.1×10 <sup>13</sup> | 3.1×10 <sup>13</sup> | 3.1×10 <sup>13</sup> | 1.1×10 <sup>14</sup> | 2.8×10 <sup>13</sup> |
| Number of animals                                    | 2/sex   | 2/sex                | 2/sex                | 2/sex                | 2/sex                | 2/sex                |
| <b>Observation</b>                                   |         |                      |                      |                      |                      |                      |
| <b>Brain</b>                                         |         |                      |                      |                      |                      |                      |
| -Perivascular mononuclear infiltrate in the meninges | 0/4     | 4/4                  | 4/4                  | 3/4                  | 4/4                  | 1/4                  |
| -Neuronal degeneration                               | 0/4     | 0/4                  | 0/4                  | 1/4                  | 2/4                  | 0/4                  |
| -Neuronal necrosis in the cerebellum                 | 0/4     | 1/4                  | 0/4                  | 1/4                  | 1/4                  | 0/4                  |
| -Gliosis/microgliosis in multiple brain levels       | 2/4     | 4/4                  | 4/4                  | 4/4                  | 4/4                  | 0/4 <sup>a</sup>     |
| <b>Dorsal Root Ganglia</b>                           |         |                      |                      |                      |                      |                      |
| -Increased cellularity                               | 1/4     | 4/4                  | 4/4                  | 3/4                  | 4/4                  | 2/4                  |
| -Neuronal degeneration                               | 1/4     | 4/4                  | 4/4                  | 3/4                  | 4/4                  | 0/4                  |
| -Glial hypertrophy/hyperplasia                       | 0/4     | 1/4                  | 2/4                  | 3/4                  | 3/4                  |                      |
| <b>Spinal Nerve Roots</b>                            |         |                      |                      |                      |                      |                      |
| -Increased cellularity                               | 0/4     | 3/4                  | 2/4                  | 4/4                  | 4/4                  | 0/4                  |
| -Degeneration                                        | 0/4     | 3/4                  | 3/4                  | 4/4                  | 4/4                  | 0/4                  |
| <b>Sciatic Nerve</b>                                 |         |                      |                      |                      |                      |                      |
| -Degeneration                                        | 0/4     | 3/4                  | 4/4                  | 3/4                  | 4/4                  | 2/4                  |
| <b>Spinal Cord</b>                                   |         |                      |                      |                      |                      |                      |
| -Degeneration of dorsal tracts                       | 1/4     | 3/4                  | 4/4                  | 3/4                  | 4/4                  | 0/4                  |
| -Gliosis of gray matter                              | 0/4     | 1/4                  | 2/4                  | 1/4                  | 4/4                  | 0/4                  |
| a: Noted in medulla oblongata only                   |         |                      |                      |                      |                      |                      |

**Table S3: Individual Histopathology – Brain**

| Treatment Group                                                                                                                                                                 | Control |   |    |    | AAV9.hCLN2-CEX       |   |    |    | AAV9.hCLN2-UC        |   |    |    | AAV9.hCLN2-AEX       |   |     |    | AAV9.hCLN2-AEX       |    |    |    | Null                 |    |    |                |
|---------------------------------------------------------------------------------------------------------------------------------------------------------------------------------|---------|---|----|----|----------------------|---|----|----|----------------------|---|----|----|----------------------|---|-----|----|----------------------|----|----|----|----------------------|----|----|----------------|
| Dose (GC/animal)                                                                                                                                                                | 0       |   |    |    | 3.1×10 <sup>13</sup> |   |    |    | 3.1×10 <sup>13</sup> |   |    |    | 3.1×10 <sup>13</sup> |   |     |    | 1.1×10 <sup>14</sup> |    |    |    | 2.8×10 <sup>13</sup> |    |    |                |
| Animal Number                                                                                                                                                                   | 1       | 2 | 13 | 14 | 5                    | 6 | 17 | 18 | 7                    | 8 | 19 | 20 | 3                    | 4 | 15A | 16 | 9A                   | 10 | 21 | 22 | 11                   | 12 | 23 | 24             |
| <b>Observation</b>                                                                                                                                                              |         |   |    |    |                      |   |    |    |                      |   |    |    |                      |   |     |    |                      |    |    |    |                      |    |    |                |
| <b>Brain</b>                                                                                                                                                                    |         |   |    |    |                      |   |    |    |                      |   |    |    |                      |   |     |    |                      |    |    |    |                      |    |    |                |
| -Perivascular mononuclear infiltrate in the meninges                                                                                                                            | -       | - | -  | -  | 2                    | 3 | 2  | 2  | 2                    | 2 | 2  | 2  | 2                    | 2 | 1   | -  | 2                    | 2  | 2  | 2  | -                    | -  | -  | 2              |
| -Neuronal degeneration                                                                                                                                                          | -       | - | -  | -  | -                    | - | -  | -  | -                    | - | -  | -  | -                    | - | 1   | -  | -                    | -  | -  | 1  | 2                    | -  | -  | -              |
| -Neuronal necrosis in the cerebellum                                                                                                                                            | -       | - | -  | -  | -                    | - | 1  | -  | -                    | - | -  | -  | 1                    | - | -   | -  | -                    | -  | -  | 1  | -                    | -  | -  | -              |
| -Gliosis/microgliosis in multiple brain levels <sup>B</sup>                                                                                                                     | -       | 1 | 2  | 3  | 2                    | 2 | 3  | 2  | 2                    | 2 | 3  | 3  | 2                    | 1 | 3   | 1  | 2                    | 3  | 4  | 3  |                      |    |    | 2 <sup>A</sup> |
| Severity Grades: 1: Minimal; 2: Mild; 3: Moderate; 4: Marked; 5: Severe<br>A: Microgliosis in in Medulla Oblongata only<br>B: Highest severity grading only<br>- : Not observed |         |   |    |    |                      |   |    |    |                      |   |    |    |                      |   |     |    |                      |    |    |    |                      |    |    |                |

**Table S4: Individual Histopathology – Spinal Cord**

| Treatment Group                         | Control |   |    |    | AAV9.hCLN2-CEX       |   |    |    | AAV9.hCLN2-UC        |   |    |    | AAV9.hCLN2-AEX       |   |     |    | AAV9.hCLN2-AEX       |    |    |    | Null                 |    |    |    |
|-----------------------------------------|---------|---|----|----|----------------------|---|----|----|----------------------|---|----|----|----------------------|---|-----|----|----------------------|----|----|----|----------------------|----|----|----|
| Dose (GC/animal)                        | 0       |   |    |    | 3.1×10 <sup>13</sup> |   |    |    | 3.1×10 <sup>13</sup> |   |    |    | 3.1×10 <sup>13</sup> |   |     |    | 1.1×10 <sup>14</sup> |    |    |    | 2.8×10 <sup>13</sup> |    |    |    |
| Animal Number                           | 1       | 2 | 13 | 14 | 5                    | 6 | 17 | 18 | 7                    | 8 | 19 | 20 | 3                    | 4 | 15A | 16 | 9A                   | 10 | 21 | 22 | 11                   | 12 | 23 | 24 |
| Observation                             |         |   |    |    |                      |   |    |    |                      |   |    |    |                      |   |     |    |                      |    |    |    |                      |    |    |    |
| <b>Spinal Cord (Cervical)</b>           |         |   |    |    |                      |   |    |    |                      |   |    |    |                      |   |     |    |                      |    |    |    |                      |    |    |    |
| -Degeneration of dorsal tracts          | -       | 1 | -  | -  | 1                    | 2 | 1  | -  | 1                    | - | 2  | 2  | 1                    | - | 2   | 1  | 2                    | 1  | 2  | 2  | -                    | -  | -  | -  |
| -Gliosis of gray matter                 | -       | - | -  | -  | -                    | - | -  | -  | -                    | - | -  | -  | -                    | - | -   | -  | 1                    | -  | -  | 2  | -                    | -  | -  | -  |
| <b>Spinal Cord (Thoracic)</b>           |         |   |    |    |                      |   |    |    |                      |   |    |    |                      |   |     |    |                      |    |    |    |                      |    |    |    |
| -Degeneration of dorsal tracts          | -       | - | -  | -  | 1                    | 2 | 1  | -  | -                    | 1 | 2  | -  | 2                    | - | 2   | 1  | 2                    | 1  | 2  | 2  | -                    | -  | -  | -  |
| -Gliosis of gray matter                 | -       | - | -  | -  | -                    | - | -  | -  | -                    | - | -  | -  | -                    | - | 2   | -  | -                    | 1  | 2  | 2  | -                    | -  | -  | -  |
| <b>Spinal Cord (Lumbar)</b>             |         |   |    |    |                      |   |    |    |                      |   |    |    |                      |   |     |    |                      |    |    |    |                      |    |    |    |
| -Degeneration of dorsal tracts          | -       | - | -  | -  | -                    | 3 | 2  | -  | 2                    | 1 | 3  | 2  | -                    | - | 3   | 3  | 3                    | 3  | 3  | 3  | -                    | -  | -  | -  |
| -Gliosis of gray matter                 | -       | - | -  | -  | -                    | - | -  | -  | -                    | - | 2  | 2  | 1                    | - | -   | -  | 2                    | 2  | 3  | 3  | -                    | -  | -  | -  |
| <b>Spinal Cord (Lumbosacral)</b>        |         |   |    |    |                      |   |    |    |                      |   |    |    |                      |   |     |    |                      |    |    |    |                      |    |    |    |
| -Degeneration of dorsal tracts          | -       | - | -  | -  | 1                    | - | -  | -  | -                    | 2 | 2  | 2  | -                    | - | 3   | 3  | 2                    | 3  | 3  | 3  | -                    | -  | -  | -  |
| -Gliosis of gray matter                 | -       | - | -  | -  | -                    | - | 1  | -  | -                    | - | 2  | 2  | -                    | - | 1   | -  | 2                    | -  | 3  | 2  | -                    | -  | -  | -  |
| <b>Spinal Nerve Roots (Cervical)</b>    |         |   |    |    |                      |   |    |    |                      |   |    |    |                      |   |     |    |                      |    |    |    |                      |    |    |    |
| -Increased cellularity                  | -       | - | -  | -  | -                    | - | -  | -  | -                    | - | 2  | -  | -                    | - | 1   | -  | 3                    | -  | -  | 1  | -                    | -  | -  | -  |
| -Degeneration                           | -       | - | -  | -  | -                    | - | -  | -  | -                    | - | 3  | -  | -                    | - | -   | -  | -                    | -  | 1  | -  | -                    | -  | -  | -  |
| <b>Spinal Nerve Roots (Thoracic)</b>    |         |   |    |    |                      |   |    |    |                      |   |    |    |                      |   |     |    |                      |    |    |    |                      |    |    |    |
| -Increased cellularity                  | -       | - | -  | -  | -                    | - | -  | -  | -                    | - | -  | -  | -                    | - | -   | -  | -                    | -  | -  | 1  | -                    | -  | -  | -  |
| -Degeneration                           | -       | - | -  | -  | -                    | - | -  | -  | -                    | - | -  | -  | -                    | - | -   | -  | -                    | -  | -  | 2  | -                    | -  | -  | -  |
| <b>Spinal Nerve Roots (Lumbar)</b>      |         |   |    |    |                      |   |    |    |                      |   |    |    |                      |   |     |    |                      |    |    |    |                      |    |    |    |
| -Increased cellularity                  | -       | - | -  | -  | -                    | 2 | -  | -  | -                    | - | 3  | 3  | -                    | - | -   | -  | 3                    | 2  | 3  | 3  | -                    | -  | -  | -  |
| -Degeneration                           | -       | - | -  | -  | -                    | - | -  | -  | -                    | - | 3  | 5  | -                    | - | -   | -  | 3                    | 2  | 3  | 4  | -                    | -  | -  | -  |
| <b>Spinal Nerve Roots (Lumbosacral)</b> |         |   |    |    |                      |   |    |    |                      |   |    |    |                      |   |     |    |                      |    |    |    |                      |    |    |    |
| -Increased cellularity                  | -       | - | -  | -  | 3                    | 3 | 3  | -  | -                    | - | 3  | 3  | 2                    | 3 | 2   | 3  | 3                    | 3  | 3  | 3  | -                    | -  | -  | -  |
| -Degeneration                           | -       | - | -  | -  | 4                    | 4 | 4  | -  | -                    | 2 | 4  | 5  | 3                    | 4 | 3   | 4  | 4                    | 4  | 4  | 4  | -                    | -  | -  | -  |

Severity Grades: 1: Minimal; 2: Mild; 3: Moderate; 4: Marked; 5: Severe  
 - : Not observed

**Table S5: Individual Histopathology – Dorsal Root Ganglion**

| Treatment Group                           | Control |   |    |    | AAV9.hCLN2-CEX       |   |    |    | AAV9.hCLN2-UC        |   |    |    | AAV9.hCLN2-AEX       |   |     |    | AAV9.hCLN2-AEX       |    |    |    | Null                 |    |    |    |
|-------------------------------------------|---------|---|----|----|----------------------|---|----|----|----------------------|---|----|----|----------------------|---|-----|----|----------------------|----|----|----|----------------------|----|----|----|
| Dose (GC/animal)                          | 0       |   |    |    | 3.1×10 <sup>13</sup> |   |    |    | 3.1×10 <sup>13</sup> |   |    |    | 3.1×10 <sup>13</sup> |   |     |    | 1.1×10 <sup>14</sup> |    |    |    | 2.8×10 <sup>13</sup> |    |    |    |
| Animal Number                             | 1       | 2 | 13 | 14 | 5                    | 6 | 17 | 18 | 7                    | 8 | 19 | 20 | 3                    | 4 | 15A | 16 | 9A                   | 10 | 21 | 22 | 11                   | 12 | 23 | 24 |
| <b>Observation</b>                        |         |   |    |    |                      |   |    |    |                      |   |    |    |                      |   |     |    |                      |    |    |    |                      |    |    |    |
| <b>Dorsal Root Ganglion (Cervical)</b>    |         |   |    |    |                      |   |    |    |                      |   |    |    |                      |   |     |    |                      |    |    |    |                      |    |    |    |
| -Increased cellularity                    | -       | - | -  | -  | -                    | - | 1  | -  | -                    | - | 2  | -  | -                    | 1 | 1   | -  | 3                    | -  | 2  | 3  | -                    | -  | -  | -  |
| -Neuronal degeneration                    | -       | - | -  | -  | -                    | - | -  | -  | -                    | - | 1  | -  | -                    | - | -   | -  | 2                    | -  | 1  | 2  | -                    | -  | -  | -  |
| -Glial hypertrophy/hyperplasia            | -       | - | -  | -  | -                    | - | -  | -  | -                    | - | 1  | -  | -                    | - | -   | -  | 1                    | -  | -  | -  | -                    | -  | -  | -  |
| <b>Dorsal Root Ganglion (Thoracic)</b>    |         |   |    |    |                      |   |    |    |                      |   |    |    |                      |   |     |    |                      |    |    |    |                      |    |    |    |
| -Increased cellularity                    | -       | - | -  | -  | -                    | - | -  | -  | -                    | - | -  | -  | -                    | 1 | -   | -  | 1                    | 1  | 2  | 2  | -                    | -  | -  | -  |
| -Neuronal degeneration                    | -       | - | -  | -  | -                    | - | -  | -  | -                    | - | -  | -  | -                    | - | -   | -  | 1                    | -  | 2  | 1  | -                    | -  | -  | -  |
| -Glial hypertrophy/hyperplasia            | -       | - | -  | -  | -                    | - | -  | -  | -                    | - | -  | -  | -                    | - | -   | -  | -                    | -  | -  | -  | -                    | -  | -  | -  |
| <b>Dorsal Root Ganglion (Lumbar)</b>      |         |   |    |    |                      |   |    |    |                      |   |    |    |                      |   |     |    |                      |    |    |    |                      |    |    |    |
| -Increased cellularity                    | -       | - | -  | -  | 1                    | 2 | 2  | -  | -                    | 1 | 3  | 3  | 1                    | - | 1   | -  | 1                    | 2  | 4  | 3  | -                    | -  | -  | -  |
| -Neuronal degeneration                    | -       | - | -  | -  | 1                    | - | -  | -  | -                    | - | 2  | 3  | -                    | - | -   | -  | 1                    | 1  | 3  | 3  | -                    | -  | -  | -  |
| -Glial hypertrophy/hyperplasia            | -       | - | -  | -  | -                    | - | -  | -  | -                    | - | -  | 1  | -                    | - | -   | -  | -                    | -  | 2  | -  | -                    | -  | -  | -  |
| <b>Dorsal Root Ganglion (Lumbosacral)</b> |         |   |    |    |                      |   |    |    |                      |   |    |    |                      |   |     |    |                      |    |    |    |                      |    |    |    |
| -Increased cellularity                    | -       | - | 1  | -  | 4                    | 4 | 3  | 2  | 2                    | 3 | 3  | 4  | 3                    | 3 | 3   | -  | 3                    | 3  | 4  | 3  | -                    | 2  | 1  | -  |
| -Neuronal degeneration                    | -       | - | 1  | -  | 2                    | 2 | 2  | 1  | 1                    | 2 | 2  | 2  | 2                    | 2 | 1   | -  | 2                    | 1  | 3  | 2  | -                    | -  | -  | -  |
| -Glial hypertrophy/hyperplasia            | -       | - | -  | -  | 2                    | - | -  | -  | -                    | - | -  | 2  | 2                    | 1 | 2   | -  | -                    | -  | -  | 1  | -                    | -  | -  | -  |
| <b>Nerve (sciatic)</b>                    |         |   |    |    |                      |   |    |    |                      |   |    |    |                      |   |     |    |                      |    |    |    |                      |    |    |    |
| -Degeneration                             | -       | - | -  | -  | 4                    | 3 | 1  | -  | 1                    | 1 | 3  | 4  | 3                    | - | 3   | 2  | 3                    | 3  | 3  | 4  | 1                    | -  | -  | 2  |

Severity Grades: 1: Minimal; 2: Mild; 3: Moderate; 4: Marked; 5: Severe  
 - : Not observed

**Table S6: Peripheral Nerve Conduction – Sural (sensory) nerve conduction velocity**

| Group | Bsl NCV L (m/s)<br>Mean±Std Dev |      | Mo1 NCV L (m/s)<br>Mean±Std Dev |      | p-value <sup>1</sup> | Bsl NCV R(m/s)<br>Mean±Std Dev |      | Mo1 NCV R (m/s)<br>Mean±Std Dev |      | p-value <sup>1</sup> |
|-------|---------------------------------|------|---------------------------------|------|----------------------|--------------------------------|------|---------------------------------|------|----------------------|
|       | 1                               | 30.0 | ±0.8                            | 31.8 |                      | ±3.0                           | 0.30 | 29.8                            | ±1.3 |                      |
| 2     | 32.3                            | ±1.3 | 32.5                            | ±1.0 | 0.77                 | 31.8                           | ±0.5 | 32.0                            | ±0.8 | 0.62                 |
| 3     | 30.8                            | ±1.5 | 31.0                            | ±1.4 | 0.82                 | 30.3                           | ±0.5 | 31.0                            | ±0.6 | 0.54                 |
| 4     | 31.3                            | ±1.3 | 32.0                            | ±1.2 | 0.41                 | 31.3                           | ±1.3 | 32.0                            | ±1.3 | 0.79                 |
| 5     | 30.8                            | ±1.0 | 31.0                            | ±1.2 | 0.75                 | 30.8                           | ±1.0 | 31.0                            | ±1.3 | 0.77                 |
| 6     | 31.0                            | ±1.2 | 30.8                            | ±1.0 | 0.75                 | 30.5                           | ±1.0 | 30.8                            | ±1.7 | 0.13                 |

<sup>1</sup>two tailed Student's t-test; normal sural NCV in primates recorded at the digital branches is > 30 m/s; minimal sural velocity varies depending on the recording location between 30 m/s and 45 m/s.

Bsl=baseline; Mo1= Day 28±1 timepoint; L=left; R=right; NCV=nerve conduction velocity

**Table S7: Peripheral Nerve Conduction – Sural (sensory) SNAP amplitude**

| Group | Bsl SNAP Amp L<br>(µV)<br>Mean±Std Dev |       | Mo1 SNAP Amp L<br>(µV)<br>Mean±Std Dev |      | p-value <sup>1</sup> | Bsl SNAP Amp R<br>(µV)<br>Mean±Std Dev |      | Mo1 SNAP Amp R<br>(µV)<br>Mean±Std Dev |      | p-value <sup>1</sup> |
|-------|----------------------------------------|-------|----------------------------------------|------|----------------------|----------------------------------------|------|----------------------------------------|------|----------------------|
|       | 1                                      | 10.6  | ±5.8                                   | 10.1 |                      | ±3.3                                   | 0.88 | ±11.1                                  | ±6.8 |                      |
| 2     | 14.8                                   | ±3.2  | 13.6                                   | ±3.9 | 0.66                 | 8.3                                    | ±4.7 | 8.5                                    | ±5.2 | 0.96                 |
| 3     | 11.4                                   | ±6.4  | 11.0                                   | ±4.2 | 0.93                 | 15.6                                   | ±6.0 | 16.1                                   | ±5.1 | 0.91                 |
| 4     | 15.5                                   | ±8.1  | 14.5                                   | ±6.6 | 0.85                 | 13.6                                   | ±7.6 | 13.1                                   | ±5.7 | 0.92                 |
| 5     | 7.5                                    | ±2.9  | 9.4                                    | ±4.6 | 0.52                 | 20.1                                   | ±9.2 | 19.7                                   | ±7.5 | 0.94                 |
| 6     | 24.7                                   | ±15.1 | 18.2                                   | ±9.8 | 0.49                 | 12.2                                   | ±5.8 | 12.7                                   | ±6.0 | 0.90                 |

<sup>1</sup>two tailed Student's t-test

Bsl=baseline; Mo1= Day 28±1 timepoint; L=left; R=right; SNAP=sensory nerve action potential

**Table S8: Peripheral Nerve Conduction – Radial (sensory) nerve conduction velocity**

| Group | Bsl NCV L (m/s)<br>Mean±Std Dev |      | Mo1 NCV L (m/s)<br>Mean±Std Dev |      | p-value <sup>1</sup> | Bsl NCV R(m/s)<br>Mean±Std Dev |      | Mo1 NCV R (m/s)<br>Mean±Std Dev |      | p-value <sup>1</sup> |
|-------|---------------------------------|------|---------------------------------|------|----------------------|--------------------------------|------|---------------------------------|------|----------------------|
|       | 1                               | 58.5 | ±2.4                            | 61.0 |                      | ±4.2                           | 0.34 | 59.5                            | ±3.3 |                      |
| 2     | 61.3                            | ±4.3 | 61.5                            | ±3.8 | 0.93                 | 61.3                           | ±4.3 | 62.0                            | ±4.0 | 0.81                 |
| 3     | 62.8                            | ±1.0 | 62.8                            | ±1.5 | 1.00                 | 61.8                           | ±1.7 | 62.8                            | ±1.2 | 0.27                 |
| 4     | 63.5                            | ±1.7 | 63.8                            | ±0.5 | 0.79                 | 63.0                           | ±2.0 | 63.8                            | ±2.4 | 0.13                 |
| 5     | 62.5                            | ±1.9 | 63.0                            | ±1.2 | 0.67                 | 62.0                           | ±1.6 | 63.0                            | ±3.0 | 0.09                 |
| 6     | 62.5                            | ±1.9 | 63.0                            | ±2.0 | 0.73                 | 62.5                           | ±1.9 | 63.0                            | ±3.0 | 1.00                 |

<sup>1</sup>two tailed Student's t-test; normal radial NCV in primates is > 50 m/s

Bsl=baseline; Mo1= Day 28±1 timepoint; L=left; R=right; NCV=nerve conduction velocity

**Table S9: Peripheral Nerve Conduction – Radial (sensory) SNAP amplitude**

| Group | Bsl SNAP Amp L (µV) |       | Mo1 SNAP Amp L (µV) |       | p-value <sup>1</sup> | Bsl SNAP Amp R (µV) |       | Mo1 SNAP Amp R (µV) |       | p-value <sup>1</sup> |
|-------|---------------------|-------|---------------------|-------|----------------------|---------------------|-------|---------------------|-------|----------------------|
|       | Mean±Std Dev        |       | Mean±Std Dev        |       |                      | Mean±Std Dev        |       | Mean±Std Dev        |       |                      |
| 1     | 50.2                | ±12.1 | 49.8                | ±10.8 | 0.96                 | 45.3                | ±19.6 | 51.6                | ±13.2 | 0.61                 |
| 2     | 37.2                | ±8.2  | 40.1                | ±8.1  | 0.63                 | 33.1                | ±11.7 | 46.8                | ±20.4 | 0.29                 |
| 3     | 34.1                | ±11.4 | 45.4                | ±14.2 | 0.26                 | 38.1                | ±21.2 | 38.6                | ±15.1 | 0.97                 |
| 4     | 30.8                | ±15.1 | 37.2                | ±4.4  | 0.45                 | 35.8                | ±11.9 | 40.4                | ±9.9  | 0.57                 |
| 5     | 59.2                | ±12.4 | 40.4                | ±13.3 | 0.08                 | 54.2                | ±13.1 | 40.4                | ±8.1  | 0.12                 |
| 6     | 34.7                | ±14.2 | 36.6                | ±10.6 | 0.83                 | 42.5                | ±33.5 | 37.5                | ±7.6  | 0.78                 |

<sup>1</sup>two tailed Student's t-test

Bsl=baseline; Mo1= Day 28±1 timepoint; L=left; R=right; SNAP=sensory nerve action potential

**Table S10: Peripheral Nerve Conduction – Fibular/peroneal (sensory) nerve conduction velocity**

| Group | Bsl NCV L (m/s) |      | Mo1 NCV L (m/s) |      | p-value <sup>1</sup> | Bsl NCV R(m/s) |      | Mo1 NCV R (m/s) |      | p-value <sup>1</sup> |
|-------|-----------------|------|-----------------|------|----------------------|----------------|------|-----------------|------|----------------------|
|       | Mean±Std Dev    |      | Mean±Std Dev    |      |                      | Mean±Std Dev   |      | Mean±Std Dev    |      |                      |
| 1     | 63.5            | ±2.5 | 64.0            | ±2.9 | 0.80                 | 62.8           | ±1.9 | 63.0            | ±3.9 | 0.91                 |
| 2     | 61.3            | ±2.5 | 61.0            | ±2.2 | 0.88                 | 62.0           | ±2.8 | 63.0            | ±2.0 | 0.58                 |
| 3     | 61.3            | ±2.1 | 61.8            | ±2.9 | 0.79                 | 61.3           | ±2.1 | 61.8            | ±1.7 | 0.39                 |
| 4     | 61.8            | ±2.9 | 61.0            | ±2.4 | 0.70                 | 61.0           | ±2.4 | 61.0            | ±0.0 | 1.00                 |
| 5     | 62.5            | ±1.7 | 61.8            | ±1.5 | 0.54                 | 63.3           | ±2.2 | 61.8            | ±3.4 | 0.64                 |
| 6     | 61.3            | ±2.1 | 61.8            | ±1.5 | 0.71                 | 61.3           | ±2.1 | 61.8            | ±3.3 | 0.29                 |

<sup>1</sup>two tailed Student's t-test; normal peroneal NCV in primates is > 50 m/s

Bsl=baseline; Mo1= Day 28±1 timepoint; L=left; R=right; NCV=nerve conduction velocity

**Table S11: Peripheral Nerve Conduction – Fibular/peroneal (sensory) SNAP amplitude**

| Group | Bsl SNAP Amp L (µV) |       | Mo1 SNAP Amp L (µV) |      | p-value <sup>1</sup> | Bsl SNAP Amp R (µV) |      | Mo1 SNAP Amp R (µV) |      | p-value <sup>1</sup> |
|-------|---------------------|-------|---------------------|------|----------------------|---------------------|------|---------------------|------|----------------------|
|       | Mean±Std Dev        |       | Mean±Std Dev        |      |                      | Mean±Std Dev        |      | Mean±Std Dev        |      |                      |
| 1     | 21.6                | ±8.3  | 21.0                | ±9.7 | 0.92                 | 23.6                | ±9.3 | 20.4                | ±6.3 | 0.59                 |
| 2     | 14.6                | ±6.2  | 16.2                | ±4.8 | 0.69                 | 14.7                | ±4.1 | 15.3                | ±3.8 | 0.82                 |
| 3     | 12.9                | ±2.6  | 13.1                | ±4.1 | 0.91                 | 17.5                | ±8.9 | 17.0                | ±4.0 | 0.91                 |
| 4     | 13.7                | ±5.3  | 14.7                | ±4.4 | 0.79                 | 13.9                | ±5.6 | 14.1                | ±3.8 | 0.96                 |
| 5     | 25.0                | ±10.3 | 20.0                | ±7.8 | 0.47                 | 24.2                | ±7.1 | 20.8                | ±4.9 | 0.47                 |
| 6     | 13.2                | ±6.7  | 13.6                | ±4.8 | 0.93                 | 15.3                | ±8.9 | 15.4                | ±8.2 | 0.98                 |

<sup>1</sup>two tailed Student's t-test

Bsl=baseline; Mo1= Day 28±1 timepoint; L=left; R=right; SNAP=sensory nerve action potential



**Table S12: Peripheral Nerve Conduction – Femoral (sensory) nerve conduction velocity**

| Group | Bsl NCV L (m/s)<br>Mean±Std Dev |      | Mo1 NCV L (m/s)<br>Mean±Std Dev |      | p-value <sup>1</sup> | Bsl NCV R (m/s)<br>Mean±Std Dev |      | Mo1 NCV R (m/s)<br>Mean±Std Dev |      | p-value <sup>1</sup> |
|-------|---------------------------------|------|---------------------------------|------|----------------------|---------------------------------|------|---------------------------------|------|----------------------|
|       | 1                               | 31.0 | ±1.2                            | 32.3 |                      | ±1.9                            | 0.30 | 32.0                            | ±1.4 |                      |
| 2     | 32.3                            | ±1.7 | 32.0                            | ±0.8 | 0.80                 | 31.8                            | ±0.5 | 32.8                            | ±0.5 | 0.03*↑               |
| 3     | 32.5                            | ±1.0 | 34.3                            | ±2.2 | 0.20                 | 32.3                            | ±1.0 | 34.3                            | ±0.8 | 0.70                 |
| 4     | 31.5                            | ±1.0 | 32.3                            | ±1.0 | 0.32                 | 32.0                            | ±0.8 | 32.3                            | ±3.4 | 0.50                 |
| 5     | 32.0                            | ±0.0 | 32.0                            | ±0.0 | -                    | 32.3                            | ±0.6 | 32.0                            | ±1.0 | 0.81                 |
| 6     | 32.3                            | ±2.4 | 32.8                            | ±1.7 | 0.74                 | 33.3                            | ±2.1 | 32.8                            | ±0.5 | 1.00                 |

↑=NCV increased compared to baseline; <sup>1</sup>two tailed Student's t-test; \*p ≤ 0.05; normal femoral NCV in primates is > 30 m/s

Bsl=baseline; Mo1= Day 28±1 timepoint; L=left; R=right; NCV=nerve conduction velocity

**Table S13: Peripheral Nerve Conduction – Femoral (sensory) SNAP amplitude**

| Group | Bsl SNAP Amp L (µV)<br>Mean±Std Dev |      | Mo1 SNAP Amp L (µV)<br>Mean±Std Dev |      | p-value <sup>1</sup> | Bsl SNAP Amp R (µV)<br>Mean±Std Dev |      | Mo1 SNAP Amp R (µV)<br>Mean±Std Dev |      | p-value <sup>1</sup> |
|-------|-------------------------------------|------|-------------------------------------|------|----------------------|-------------------------------------|------|-------------------------------------|------|----------------------|
|       | 1                                   | 15.4 | ±2.3                                | 13.3 |                      | ±1.2                                | 0.17 | 14.9                                | ±3.4 |                      |
| 2     | 13.5                                | ±3.4 | 13.9                                | ±2.2 | 0.85                 | 13.1                                | ±2.4 | 13.0                                | ±2.3 | 0.97                 |
| 3     | 12.2                                | ±1.8 | 12.5                                | ±2.3 | 0.86                 | 11.6                                | ±0.7 | 12.0                                | ±2.7 | 0.82                 |
| 4     | 13.5                                | ±2.3 | 13.8                                | ±2.0 | 0.85                 | 13.2                                | ±2.3 | 12.9                                | ±0.6 | 0.84                 |
| 5     | 14.8                                | ±1.3 | 14.2                                | ±1.3 | 0.62                 | 15.4                                | ±2.6 | 15.1                                | ±3.6 | 0.91                 |
| 6     | 14.7                                | ±4.4 | 15.0                                | ±2.8 | 0.93                 | 14.9                                | ±3.0 | 13.9                                | ±1.7 | 0.58                 |

<sup>1</sup>two tailed Student's t-test

Bsl=baseline; Mo1= Day 28±1 timepoint; L=left; R=right; SNAP=sensory nerve action potential

**Table S14: Peripheral Nerve Conduction – Tibial (motor) nerve conduction velocity**

| Group | Bsl NCV L (m/s)<br>Mean±Std Dev |      | Mo1 NCV L (m/s)<br>Mean±Std Dev |      | p-value <sup>1</sup> | Bsl NCV R (m/s)<br>Mean±Std Dev |      | Mo1 NCV R (m/s)<br>Mean±Std Dev |      | p-value |
|-------|---------------------------------|------|---------------------------------|------|----------------------|---------------------------------|------|---------------------------------|------|---------|
|       | 1                               | 73.8 | ±7.6                            | 78.8 |                      | ±6.3                            | 0.35 | 73.8                            | ±8.0 |         |
| 2     | 80.0                            | ±1.6 | 81.8                            | ±2.4 | 0.27                 | 80.0                            | ±1.9 | 82.0                            | ±3.6 | 0.26    |
| 3     | 81.0                            | ±1.2 | 82.3                            | ±2.1 | 0.33                 | 81.0                            | ±1.2 | 81.0                            | ±1.2 | 1.00    |
| 4     | 81.8                            | ±2.9 | 84.0                            | ±6.4 | 0.54                 | 81.8                            | ±2.9 | 82.3                            | ±3.7 | 0.84    |
| 5     | 82.0                            | ±0.0 | 84.0                            | ±4.0 | 0.36                 | 82.0                            | ±0.0 | 84.5                            | ±2.9 | 0.13    |
| 6     | 77.0                            | ±1.4 | 80.5                            | ±1.9 | 0.03*↑               | 77.0                            | ±1.4 | 82.3                            | ±2.1 | 0.01*↑  |

↑=NCV increased compared to baseline; <sup>1</sup>two tailed Student's t-test; \*p ≤ 0.05; normal tibial NCV in primates is > 60 m/s

Bsl=baseline; Mo1= Day 28±1 timepoint; L=left; R=right; NCV=nerve conduction velocity

**Table S15: Peripheral Nerve Conduction – Tibial (motor) CMAP amplitude and duration at Hock**

| Group | Bsl CMAP Amp L (mV) |          | Mo1 CMAP Amp L (mV) |          | p-value <sup>1</sup> | Bsl CMAP Dur L (ms) |          | Mo1 CMAP Dur L (ms) |          | p-value |
|-------|---------------------|----------|---------------------|----------|----------------------|---------------------|----------|---------------------|----------|---------|
|       | Mean                | ±Std Dev | Mean                | ±Std Dev |                      | Mean                | ±Std Dev | Mean                | ±Std Dev |         |
| 1     | 10.0                | ±3.2     | 6.3                 | ±2.4     | 0.11                 | 2.8                 | ±1.1     | 3.0                 | ±0.8     | 0.81    |
| 2     | 11.4                | ±4.7     | 8.9                 | ±3.9     | 0.46                 | 2.1                 | ±0.3     | 2.1                 | ±0.2     | 0.86    |
| 3     | 6.4                 | ±3.3     | 7.3                 | ±2.2     | 0.66                 | 2.5                 | ±0.3     | 2.5                 | ±0.5     | 0.91    |
| 4     | 12.7                | ±6.9     | 7.9                 | ±2.1     | 0.23                 | 2.6                 | ±0.5     | 2.5                 | ±0.4     | 0.56    |
| 5     | 9.5                 | ±6.0     | 6.6                 | ±2.3     | 0.40                 | 2.0                 | ±0.5     | 2.1                 | ±0.3     | 0.76    |
| 6     | 5.7                 | ±3.7     | 6.4                 | ±3.8     | 0.81                 | 2.8                 | ±1.0     | 7.4                 | ±0.5     | 0.63    |

<sup>1</sup>two tailed Student's t-test

Bsl=baseline; Mo1= Day 28±1 timepoint; L=left; CMAP=compound muscle action potential

**Table S16: Peripheral Nerve Conduction – Tibial (motor) CMAP amplitude and duration at Popliteal Fossa**

| Group | Bsl CMAP Amp L (mV) |          | Mo1 CMAP Amp L (mV) |          | p-value <sup>1</sup> | Bsl CMAP Dur L (ms) |          | Mo1 CMAP Dur L (ms) |          | p-value           |
|-------|---------------------|----------|---------------------|----------|----------------------|---------------------|----------|---------------------|----------|-------------------|
|       | Mean                | ±Std Dev | Mean                | ±Std Dev |                      | Mean                | ±Std Dev | Mean                | ±Std Dev |                   |
| 1     | 6.8                 | ±3.7     | 4.5                 | ±2.2     | 0.33                 | 3.6                 | ±1.3     | 2.3                 | ±0.8     | 0.15              |
| 2     | 7.6                 | ±2.9     | 9.4                 | ±4.0     | 0.50                 | 1.9                 | ±0.1     | 2.2                 | ±0.3     | 0.03 <sup>2</sup> |
| 3     | 5.2                 | ±1.8     | 6.6                 | ±2.2     | 0.36                 | 2.3                 | ±0.3     | 2.6                 | ±0.7     | 0.50              |
| 4     | 11.4                | ±4.4     | 6.4                 | ±1.8     | 0.08                 | 2.1                 | ±0.4     | 2.1                 | ±0.8     | 0.97              |
| 5     | 5.7                 | ±3.7     | 5.9                 | ±2.4     | 0.93                 | 1.8                 | ±0.5     | 2.0                 | ±0.3     | 0.59              |
| 6     | 4.9                 | ±3.4     | 7.4                 | ±4.6     | 0.41                 | 2.9                 | ±1.6     | 2.5                 | ±0.5     | 0.66              |

<sup>1</sup>two tailed Student's t-test; <sup>2</sup> change not considered physiologically relevant

Bsl=baseline; Mo1= Day 28±1 timepoint; L=left; CMAP=compound muscle action potential

**Table S17: Intraepidermal Nerve Fiber Density**

| Group          | Dose (GC/animal)     | Animal  | In-life Density (nerve fibers/mm) | Post-Life Density (nerve fibers/mm) | In-life compared to Post-Life (p-value) |
|----------------|----------------------|---------|-----------------------------------|-------------------------------------|-----------------------------------------|
| Control        | 0                    | 1       | 61.52                             | 49.87                               |                                         |
|                |                      | 2       | 46.85                             | 52.64                               |                                         |
|                |                      | 13      | 59.96                             | 63.19                               |                                         |
|                |                      | 14      | 67.29                             | 55.74                               |                                         |
|                |                      | Average | <b>58.91</b>                      | <b>55.36</b>                        | <b>0.5038</b>                           |
|                |                      | Std Dev | <b>8.63</b>                       | <b>5.74</b>                         |                                         |
| AAV9.hCLN2-CEX | 3.1×10 <sup>13</sup> | 5       | 52.08                             | 29.88                               |                                         |
|                |                      | 6       | 59.87                             | 25.23                               |                                         |
|                |                      | 17      | 62.25                             | 56.47                               |                                         |
|                |                      | 18      | 43.56                             | 42.32                               |                                         |
|                |                      | Average | <b>54.44</b>                      | <b>38.48</b>                        | <b>0.1292</b>                           |
|                |                      | Std Dev | <b>8.45</b>                       | <b>14.00</b>                        |                                         |
| AAV9.hCLN2-UC  | 3.1×10 <sup>13</sup> | 7       | 66.60                             | 41.24                               |                                         |
|                |                      | 8       | 76.05                             | 57.28                               |                                         |
|                |                      | 19      | 47.63                             | 47.48                               |                                         |
|                |                      | 20      | 66.80                             | 42.91                               |                                         |
|                |                      | Average | <b>64.27</b>                      | <b>47.23</b>                        | <b>0.0607</b>                           |
|                |                      | Std Dev | <b>11.94</b>                      | <b>7.2</b>                          |                                         |
| AAV9.hCLN2-AEX | 3.1×10 <sup>13</sup> | 3       | 52.08                             | 29.88                               |                                         |
|                |                      | 4       | 59.87                             | 25.23                               |                                         |
|                |                      | 15A     | 62.25                             | 56.47                               |                                         |
|                |                      | 16      | 43.56                             | 42.32                               |                                         |
|                |                      | Average | <b>47.25</b>                      | <b>45.51</b>                        | <b>0.6657</b>                           |
|                |                      | Std Dev | <b>6.63</b>                       | <b>13.41</b>                        |                                         |
| AAV9.hCLN2-AEX | 1.1×10 <sup>14</sup> | 9A      | -                                 | 40.35                               |                                         |
|                |                      | 10      | 41.63                             | 45.1                                |                                         |
|                |                      | 21      | 33.72                             | 49.94                               |                                         |
|                |                      | 22      | 62.79                             | 44.27                               |                                         |
|                |                      | Average | <b>46.05</b>                      | <b>44.92</b>                        | <b>0.9728</b>                           |
|                |                      | Std Dev | <b>15.03</b>                      | <b>3.94</b>                         |                                         |
| Null           | 2.8×10 <sup>13</sup> | 11      | 71.24                             | 41.56                               |                                         |
|                |                      | 12      | 42.17                             | 42.83                               |                                         |
|                |                      | 23      | 40.55                             | -                                   |                                         |
|                |                      | 24      | 36.17                             | 47.44                               |                                         |
|                |                      | Average | <b>47.53</b>                      | <b>43.94</b>                        | <b>0.6773</b>                           |
|                |                      | Std Dev | <b>16.01</b>                      | <b>3.09</b>                         |                                         |

Data were statistically analyzed using a standard t-test. The resulting p-values of the standard t-test are reported as "In-Life Compared to Post-Life" in the data table. The t-test was two-tailed (meaning no hypothesis was made on which group was expected to have the highest values), and independent (meaning the data did not rely on the data from other groups). Statistical analyses were performed comparing test article-dosed groups against their sex-matched controls. A p value <0.05 was considered statistically significant.

**Table S18: Individual MRI Data – Dorsal Spinal Cord**

| Group | Animal         | Time           | Axial-Diffusion (mm <sup>2</sup> /s) | FA (N/A)      | Mean Diffusivity (mm <sup>2</sup> /s) | Radial-Diffusion (mm <sup>2</sup> /s) | STIR-Intensity  | s2neuroT2TFE Intensity |
|-------|----------------|----------------|--------------------------------------|---------------|---------------------------------------|---------------------------------------|-----------------|------------------------|
| 1     | 1              | Baseline       | 0.00120075                           | 0.377746      | 0.000829654                           | 0.000644096                           | 216.222         | 572.333                |
|       | 2              | Baseline       | 0.00186243                           | 0.442552      | 0.0012299                             | 0.000913626                           | 207.813         | 495.034                |
|       | 13             | Baseline       | 0.00358588                           | 0.352199      | 0.00255417                            | 0.0020383                             | -               | 468.361                |
|       | 14             | Baseline       | 0.00171107                           | 0.588897      | 0.000989876                           | 0.000629458                           | 187.589         | 493.697                |
|       |                | <b>Mean</b>    | <b>0.0021</b>                        | <b>0.4403</b> | <b>0.0014</b>                         | <b>0.0011</b>                         | <b>203.8747</b> | <b>507.3563</b>        |
|       |                | <b>Std Dev</b> | <b>0.0010</b>                        | <b>0.1061</b> | <b>0.0008</b>                         | <b>0.0007</b>                         | <b>14.7172</b>  | <b>45.0223</b>         |
|       |                |                |                                      |               |                                       |                                       |                 |                        |
|       | 1              | 4 Weeks        | 0.00130688                           | 0.388437      | 0.000901472                           | 0.000698771                           | 217.213         | 495.091                |
|       | 2              | 4 Weeks        | 0.00147402                           | 0.498117      | 0.000940103                           | 0.000673108                           | 199.007         | 392.891                |
|       | 13             | 4 Weeks        | 0.00228556                           | 0.482422      | 0.00144598                            | 0.00102615                            | 245.646         | 657.755                |
|       | 14             | 4 Weeks        | 0.00209573                           | 0.496266      | 0.0013433                             | 0.000967106                           | 220.331         | 479.323                |
|       |                | <b>Mean</b>    | <b>0.0018</b>                        | <b>0.4663</b> | <b>0.0012</b>                         | <b>0.0008</b>                         | <b>220.5493</b> | <b>506.2650</b>        |
|       |                | <b>Std Dev</b> | <b>0.0005</b>                        | <b>0.0524</b> | <b>0.0003</b>                         | <b>0.0002</b>                         | <b>19.1928</b>  | <b>110.5345</b>        |
|       |                | <b>p-value</b> | 0.4776                               | 0.6162        | 0.4988                                | 0.5130                                | 0.5757          | 0.9879                 |
|       |                |                |                                      |               |                                       |                                       |                 |                        |
| 5     | 10             | Baseline       | 0.00160139                           | 0.433951      | 0.00106099                            | 0.0007908                             | 180.545         | 205.222                |
|       | 21             | Baseline       | 0.00300759                           | 0.439511      | 0.00197255                            | 0.00145504                            | -               | 446.847                |
|       | 22             | Baseline       | 0.00246861                           | 0.34194       | 0.00180666                            | 0.00147568                            | 220.601         | 465.851                |
|       |                | <b>Mean</b>    | <b>0.0024</b>                        | <b>0.4051</b> | <b>0.0016</b>                         | <b>0.0012</b>                         | <b>200.5730</b> | <b>372.6400</b>        |
|       |                | <b>Std Dev</b> | <b>0.0007</b>                        | <b>0.0548</b> | <b>0.0005</b>                         | <b>0.0004</b>                         | <b>28.3239</b>  | <b>145.2993</b>        |
|       |                |                |                                      |               |                                       |                                       |                 |                        |
|       | 9A             | 4 Weeks        | 0.00128445                           | 0.335336      | 0.000908114                           | 0.000719929                           | 233.449         | 465.97                 |
|       | 10             | 4 Weeks        | 0.00145124                           | 0.359459      | 0.0010285                             | 0.000817113                           | 207.915         | 537.373                |
|       | 21             | 4 Weeks        | 0.00201447                           | 0.380451      | 0.00141343                            | 0.00111291                            | 295.743         | 505.945                |
|       | 22             | 4 Weeks        | 0.00155738                           | 0.352179      | 0.00110892                            | 0.000884648                           | 228.73          | 427.006                |
|       |                | <b>Mean</b>    | <b>0.0016</b>                        | <b>0.3569</b> | <b>0.0011</b>                         | <b>0.0009</b>                         | <b>241.4593</b> | <b>484.0735</b>        |
|       |                | <b>Std Dev</b> | <b>0.0003</b>                        | <b>0.0187</b> | <b>0.0002</b>                         | <b>0.0002</b>                         | <b>37.8512</b>  | <b>47.9709</b>         |
|       | <b>p-value</b> | 0.1254         | 0.2554                               | 0.1680        | 0.2339                                | 0.3162                                | 0.4009          |                        |

FA: Fractional anisotropy

Data were statistically analyzed using a standard t-test. Statistical analyses were performed comparing groups against their baseline. A p value <0.05 was considered statistically significant.

**Table S19: Individual MRI Data – L3**

| Group | Animal | Time           | Axial-Diffusion (mm <sup>2</sup> /s) | FA (N/A)      | Mean Diffusivity (mm <sup>2</sup> /s) | Radial-Diffusion (mm <sup>2</sup> /s) | STIR-Intensity  | s2neuroT2TfE-Intensity |
|-------|--------|----------------|--------------------------------------|---------------|---------------------------------------|---------------------------------------|-----------------|------------------------|
| 1     | 1      | Baseline       | 0.00254818                           | 0.419432      | 0.00171813                            | 0.0013031                             | 229.884         | 311.782                |
|       | 2      | Baseline       | 0.00210474                           | 0.306864      | 0.00163338                            | 0.0013977                             | 182.754         | 298.096                |
|       | 13     | Baseline       | 0.00177128                           | 0.358492      | 0.00140381                            | 0.00122006                            | -               | 286.552                |
|       | 14     | Baseline       | 0.00274187                           | 0.325031      | 0.00207462                            | 0.00174102                            | 273.909         | 373.61                 |
|       |        | <b>Mean</b>    | <b>0.0023</b>                        | <b>0.3525</b> | <b>0.0017</b>                         | <b>0.0014</b>                         | <b>228.8490</b> | <b>317.5100</b>        |
|       |        | <b>Std Dev</b> | <b>0.0004</b>                        | <b>0.0495</b> | <b>0.0003</b>                         | <b>0.0002</b>                         | <b>45.5863</b>  | <b>38.7957</b>         |
|       |        |                |                                      |               |                                       |                                       |                 |                        |
|       | 1      | 4 Weeks        | 0.00137762                           | 0.461512      | 0.000956394                           | 0.000745762                           | 149.698         | 306.284                |
|       | 2      | 4 Weeks        | 0.00193208                           | 0.35845       | 0.0014947                             | 0.00127597                            | 156.513         | 285.009                |
|       | 13     | 4 Weeks        | 0.00251558                           | 0.297468      | 0.00198014                            | 0.00171238                            | 209.127         | 357.326                |
|       | 14     | 4 Weeks        | 0.00217019                           | 0.332149      | 0.00161341                            | 0.00133503                            | 256.08          | 347.454                |
|       |        | <b>Mean</b>    | <b>0.0020</b>                        | <b>0.3624</b> | <b>0.0015</b>                         | <b>0.0013</b>                         | <b>192.8545</b> | <b>324.0183</b>        |
|       |        | <b>Std Dev</b> | <b>0.0005</b>                        | <b>0.0706</b> | <b>0.0004</b>                         | <b>0.0004</b>                         | <b>49.8178</b>  | <b>34.1314</b>         |
|       |        | <b>p-value</b> | 0.5192                               | 0.7228        | 0.5434                                | 0.5681                                | 0.1681          | 0.7852                 |
|       |        |                |                                      |               |                                       |                                       |                 |                        |
| 5     | 10     | Baseline       | 0.00195684                           | 0.325297      | 0.00154283                            | 0.0013358                             | 119.781         | 249.798                |
|       | 21     | Baseline       | 0.00212273                           | 0.387806      | 0.00150558                            | 0.001197                              | -               | 305.819                |
|       | 22     | Baseline       | 0.00131334                           | 0.482013      | 0.00094252                            | 0.000757093                           | 186.584         | 275.208                |
|       |        | <b>Mean</b>    | <b>0.0018</b>                        | <b>0.3984</b> | <b>0.0013</b>                         | <b>0.0011</b>                         | <b>153.1825</b> | <b>276.9417</b>        |
|       |        | <b>Std Dev</b> | <b>0.0004</b>                        | <b>0.0789</b> | <b>0.0003</b>                         | <b>0.0003</b>                         | <b>47.2369</b>  | <b>28.0507</b>         |
|       |        |                |                                      |               |                                       |                                       |                 |                        |
|       | 9A     | 4 Weeks        | 0.00148586                           | 0.431432      | 0.00105765                            | 0.000843535                           | 181.999         | 294.449                |
|       | 10     | 4 Weeks        | 0.00213318                           | 0.376377      | 0.00154507                            | 0.001251                              | 185.483         | 345.032                |
|       | 21     | 4 Weeks        | 0.00200624                           | 0.36973       | 0.00145237                            | 0.00117542                            | 155.303         | 362.748                |
|       | 22     | 4 Weeks        | 0.00202447                           | 0.363506      | 0.00147571                            | 0.00120129                            | 189.642         | 402.046                |
|       |        | <b>Mean</b>    | <b>0.0019</b>                        | <b>0.3853</b> | <b>0.0014</b>                         | <b>0.0011</b>                         | <b>178.1068</b> | <b>351.0688</b>        |
|       |        | <b>Std Dev</b> | <b>0.0003</b>                        | <b>0.0312</b> | <b>0.0002</b>                         | <b>0.0002</b>                         | <b>15.5202</b>  | <b>44.6368</b>         |
|       |        | <b>p-value</b> | 0.4000                               | 0.6212        | 0.4804                                | 0.5692                                | 0.4704          | <b>0.0441</b>          |

FA: Fractional anisotropy

Data were statistically analyzed using a standard t-test. Statistical analyses were performed comparing groups against their baseline. A p value <0.05 was considered statistically significant.

**Table S20: Individual MRI Data – L4**

| Group | Animal | Time           | Axial-Diffusion (mm <sup>2</sup> /s) | FA (N/A)      | Mean Diffusivity (mm <sup>2</sup> /s) | Radial-Diffusion (mm <sup>2</sup> /s) | STIR-Intensity  | s2neuroT2TFE-Intensity |
|-------|--------|----------------|--------------------------------------|---------------|---------------------------------------|---------------------------------------|-----------------|------------------------|
| 1     | 1      | Baseline       | 0.00164009                           | 0.480537      | 0.00109337                            | 0.000820004                           | 140.605         | 312.313                |
|       | 2      | Baseline       | 0.00183719                           | 0.387882      | 0.00130171                            | 0.00103396                            | 145.795         | 329.708                |
|       | 13     | Baseline       | 0.00161384                           | 0.388804      | 0.00122764                            | 0.00103453                            | -               | 301.515                |
|       | 14     | Baseline       | 0.00232294                           | 0.349862      | 0.00171092                            | 0.00140491                            | 194.55          | 345.484                |
|       |        | <b>Mean</b>    | <b>0.0019</b>                        | <b>0.4018</b> | <b>0.0013</b>                         | <b>0.0011</b>                         | <b>160.3167</b> | <b>322.2550</b>        |
|       |        | <b>Std Dev</b> | <b>0.0003</b>                        | <b>0.0556</b> | <b>0.0003</b>                         | <b>0.0002</b>                         | <b>29.7603</b>  | <b>19.3574</b>         |
|       |        |                |                                      |               |                                       |                                       |                 |                        |
|       | 1      | 4 Weeks        | 0.00158203                           | 0.451504      | 0.00109979                            | 0.000858655                           | 154.637         | 332.698                |
|       | 2      | 4 Weeks        | 0.00195503                           | 0.427391      | 0.00134453                            | 0.00103925                            | 155.568         | 356.948                |
|       | 13     | 4 Weeks        | 0.00241949                           | 0.369827      | 0.00176532                            | 0.00143822                            | 197.872         | 359.617                |
|       | 14     | 4 Weeks        | 0.00166999                           | 0.38537       | 0.00123614                            | 0.0010192                             | 212.727         | 325.864                |
|       |        | <b>Mean</b>    | <b>0.0019</b>                        | <b>0.4085</b> | <b>0.0014</b>                         | <b>0.0011</b>                         | <b>180.2010</b> | <b>343.7818</b>        |
|       |        | <b>Std Dev</b> | <b>0.0004</b>                        | <b>0.0376</b> | <b>0.0003</b>                         | <b>0.0002</b>                         | <b>29.6114</b>  | <b>17.0098</b>         |
|       |        | <b>p-value</b> | 0.8708                               | 0.7311        | 0.9008                                | 0.9296                                | <b>0.0288</b>   | 0.2707                 |
|       |        |                |                                      |               |                                       |                                       |                 |                        |
| 5     | 10     | Baseline       | 0.0018994                            | 0.390417      | 0.00142887                            | 0.00119359                            | 132.279         | 301.655                |
|       | 21     | Baseline       | 0.00161676                           | 0.497399      | 0.00106419                            | 0.000787914                           | -               | 300.433                |
|       | 22     | Baseline       | 0.00115742                           | 0.503597      | 0.000801095                           | 0.00062291                            | 153.137         | 290.143                |
|       |        | <b>Mean</b>    | <b>0.0016</b>                        | <b>0.4638</b> | <b>0.0011</b>                         | <b>0.0009</b>                         | <b>142.7080</b> | <b>297.4103</b>        |
|       |        | <b>Std Dev</b> | <b>0.0004</b>                        | <b>0.0636</b> | <b>0.0003</b>                         | <b>0.0003</b>                         | <b>14.7488</b>  | <b>6.3233</b>          |
|       |        |                |                                      |               |                                       |                                       |                 |                        |
|       | 9A     | 4 Weeks        | 0.00168598                           | 0.445452      | 0.00113229                            | 0.000855428                           | 192.15          | 343.738                |
|       | 10     | 4 Weeks        | 0.0021749                            | 0.409252      | 0.00150562                            | 0.00117096                            | 191.293         | 393.707                |
|       | 21     | 4 Weeks        | 0.00191731                           | 0.367454      | 0.00136742                            | 0.00109246                            | 191.423         | 402.882                |
|       | 22     | 4 Weeks        | 0.00205229                           | 0.371177      | 0.00146943                            | 0.00117797                            | 203.456         | 420.291                |
|       |        | <b>Mean</b>    | <b>0.0020</b>                        | <b>0.3983</b> | <b>0.0014</b>                         | <b>0.0011</b>                         | <b>194.5805</b> | <b>390.1545</b>        |
|       |        | <b>Std Dev</b> | <b>0.0002</b>                        | <b>0.0367</b> | <b>0.0002</b>                         | <b>0.0002</b>                         | <b>5.9290</b>   | <b>32.8497</b>         |
|       |        | <b>p-value</b> | 0.1364                               | 0.2460        | 0.1798                                | 0.2372                                | 0.0505          | <b>0.0109</b>          |

FA: Fractional anisotropy

Data were statistically analyzed using a standard t-test. Statistical analyses were performed comparing groups against their baseline. A p value <0.05 was considered statistically significant.

**Table S21: Individual MRI Data – L5**

| Group | Animal         | Time           | Axial-Diffusion (mm <sup>2</sup> /s) | FA (N/A)      | Mean Diffusivity (mm <sup>2</sup> /s) | Radial-Diffusion (mm <sup>2</sup> /s) | STIR-Intensity  | s2neuroT2TFE-Intensity |
|-------|----------------|----------------|--------------------------------------|---------------|---------------------------------------|---------------------------------------|-----------------|------------------------|
| 1     | 1              | Baseline       | 0.00171802                           | 0.513196      | 0.00108433                            | 0.000767472                           | 136.523         | 307.388                |
|       | 2              | Baseline       | 0.00183058                           | 0.477933      | 0.00119043                            | 0.000870346                           | 146.86          | 335.953                |
|       | 13             | Baseline       | 0.00119133                           | 0.534825      | 0.000793294                           | 0.000594253                           | -               | 293.161                |
|       | 14             | Baseline       | 0.00202071                           | 0.475374      | 0.00130486                            | 0.000946939                           | 163.455         | 388.222                |
|       |                | <b>Mean</b>    | <b>0.0017</b>                        | <b>0.5003</b> | <b>0.0011</b>                         | <b>0.0008</b>                         | <b>148.9460</b> | <b>331.1810</b>        |
|       |                | <b>Std Dev</b> | <b>0.0004</b>                        | <b>0.0288</b> | <b>0.0002</b>                         | <b>0.0002</b>                         | <b>13.5866</b>  | <b>41.9844</b>         |
|       |                |                |                                      |               |                                       |                                       |                 |                        |
|       | 1              | 4 Weeks        | 0.00178225                           | 0.514975      | 0.00113855                            | 0.000816686                           | 189.72          | 340.438                |
|       | 2              | 4 Weeks        | 0.00202022                           | 0.451508      | 0.00134671                            | 0.00100994                            | 198.558         | 394.455                |
|       | 13             | 4 Weeks        | 0.002171                             | 0.443973      | 0.00146674                            | 0.00111458                            | 198.43          | 373.173                |
|       | 14             | 4 Weeks        | 0.00191686                           | 0.45356       | 0.0013009                             | 0.000992919                           | 231.89          | 384.967                |
|       |                | <b>Mean</b>    | <b>0.0020</b>                        | <b>0.4660</b> | <b>0.0013</b>                         | <b>0.0010</b>                         | <b>204.6495</b> | <b>373.2583</b>        |
|       |                | <b>Std Dev</b> | <b>0.0002</b>                        | <b>0.0329</b> | <b>0.0001</b>                         | <b>0.0001</b>                         | <b>18.6255</b>  | <b>23.5483</b>         |
|       |                | <b>p-value</b> | 0.3243                               | 0.1818        | 0.2502                                | 0.1923                                | <b>0.0085</b>   | 0.1003                 |
|       |                |                |                                      |               |                                       |                                       |                 |                        |
| 5     | 10             | Baseline       | 0.00179584                           | 0.42432       | 0.00125173                            | 0.000979678                           | 142.24          | 309.457                |
|       | 21             | Baseline       | 0.00164786                           | 0.640985      | 0.000893478                           | 0.000516288                           | -               | 344.361                |
|       | 22             | Baseline       | 0.00132893                           | 0.510176      | 0.000874912                           | 0.000647898                           | 155.895         | 311.214                |
|       |                | <b>Mean</b>    | <b>0.0016</b>                        | <b>0.5252</b> | <b>0.0010</b>                         | <b>0.0007</b>                         | <b>149.0675</b> | <b>321.6773</b>        |
|       |                | <b>Std Dev</b> | <b>0.0002</b>                        | <b>0.1091</b> | <b>0.0002</b>                         | <b>0.0002</b>                         | <b>9.6555</b>   | <b>19.6643</b>         |
|       |                |                |                                      |               |                                       |                                       |                 |                        |
|       | 9A             | 4 Weeks        | 0.00158349                           | 0.446996      | 0.0010521                             | 0.000786382                           | 243.059         | 368.202                |
|       | 10             | 4 Weeks        | 0.00194564                           | 0.427661      | 0.00131997                            | 0.00100711                            | 194.482         | 392.925                |
|       | 21             | 4 Weeks        | 0.00179698                           | 0.428462      | 0.00122466                            | 0.000938493                           | 204.062         | 397.044                |
|       | 22             | 4 Weeks        | 0.00186158                           | 0.453116      | 0.00123514                            | 0.000921888                           | 199.246         | 408.704                |
|       |                | <b>Mean</b>    | <b>0.0018</b>                        | <b>0.4391</b> | <b>0.0012</b>                         | <b>0.0009</b>                         | <b>210.2123</b> | <b>391.7188</b>        |
|       |                | <b>Std Dev</b> | <b>0.0002</b>                        | <b>0.0129</b> | <b>0.0001</b>                         | <b>0.0001</b>                         | <b>22.2444</b>  | <b>17.0426</b>         |
|       | <b>p-value</b> | 0.1622         | 0.3015                               | 0.1123        | 0.1712                                | 0.0590                                | <b>0.0277</b>   |                        |

FA: Fractional anisotropy

Data were statistically analyzed using a standard t-test. Statistical analyses were performed comparing groups against their baseline. A p value <0.05 was considered statistically significant.

**Table S22: Individual MRI Data – L6**

| Group | Animal         | Time           | Axial-Diffusion (mm <sup>2</sup> /s) | FA (N/A)      | Mean Diffusivity (mm <sup>2</sup> /s) | Radial-Diffusion (mm <sup>2</sup> /s) | STIR-Intensity  | s2neuroT2TFE-Intensity |
|-------|----------------|----------------|--------------------------------------|---------------|---------------------------------------|---------------------------------------|-----------------|------------------------|
| 1     | 1              | Baseline       | 0.00159837                           | 0.554987      | 0.00099051                            | 0.000686566                           | 156.526         | 338.848                |
|       | 2              | Baseline       | 0.00187633                           | 0.530051      | 0.00115788                            | 0.000798624                           | 139.23          | 330.96                 |
|       | 13             | Baseline       | 0.00143129                           | 0.531231      | 0.000934308                           | 0.000685796                           | -               | 273.402                |
|       | 14             | Baseline       | 0.0017205                            | 0.494426      | 0.00109932                            | 0.000788728                           | 143.242         | 330.732                |
|       |                | <b>Mean</b>    | <b>0.0017</b>                        | <b>0.5277</b> | <b>0.0010</b>                         | <b>0.0007</b>                         | <b>146.3327</b> | <b>318.4855</b>        |
|       |                | <b>Std Dev</b> | <b>0.0002</b>                        | <b>0.0250</b> | <b>0.0001</b>                         | <b>0.0001</b>                         | <b>9.0527</b>   | <b>30.2916</b>         |
|       |                |                |                                      |               |                                       |                                       |                 |                        |
|       | 1              | 4 Weeks        | 0.00158257                           | 0.468136      | 0.00105818                            | 0.000795969                           | 196.544         | 355.668                |
|       | 2              | 4 Weeks        | 0.00204625                           | 0.513793      | 0.00131583                            | 0.000950595                           | 194.136         | 370.981                |
|       | 13             | 4 Weeks        | 0.00196683                           | 0.342915      | 0.00144639                            | 0.00118614                            | 193.588         | 340.436                |
|       | 14             | 4 Weeks        | 0.00183349                           | 0.454908      | 0.00124615                            | 0.000952471                           | 201.097         | 334.271                |
|       |                | <b>Mean</b>    | <b>0.0019</b>                        | <b>0.4449</b> | <b>0.0013</b>                         | <b>0.0010</b>                         | <b>196.3413</b> | <b>350.3390</b>        |
|       |                | <b>Std Dev</b> | <b>0.0002</b>                        | <b>0.0725</b> | <b>0.0002</b>                         | <b>0.0002</b>                         | <b>3.4206</b>   | <b>16.4392</b>         |
|       |                | <b>p-value</b> | 0.1881                               | 0.1185        | 0.1117                                | 0.0833                                | 0.0115          | 0.1065                 |
|       |                |                |                                      |               |                                       |                                       |                 |                        |
| 5     | 10             | Baseline       | 0.00174956                           | 0.484861      | 0.00115743                            | 0.000861361                           | 172.861         | 350.049                |
|       | 21             | Baseline       | 0.0012488                            | 0.643431      | 0.000679148                           | 0.000394318                           | -               | 236.313                |
|       | 22             | Baseline       | 0.00129135                           | 0.519297      | 0.000856608                           | 0.000639229                           | 112.58          | 235.083                |
|       |                | <b>Mean</b>    | <b>0.0014</b>                        | <b>0.5492</b> | <b>0.0009</b>                         | <b>0.0006</b>                         | <b>142.7205</b> | <b>273.8150</b>        |
|       |                | <b>Std Dev</b> | <b>0.0003</b>                        | <b>0.0834</b> | <b>0.0002</b>                         | <b>0.0002</b>                         | <b>42.6251</b>  | <b>66.0234</b>         |
|       |                |                |                                      |               |                                       |                                       |                 |                        |
|       | 9A             | 4 Weeks        | 0.00153564                           | 0.49319       | 0.000999931                           | 0.000732061                           | 233.007         | 332.064                |
|       | 10             | 4 Weeks        | 0.00200311                           | 0.377531      | 0.00142451                            | 0.00113518                            | 248.734         | 455.517                |
|       | 21             | 4 Weeks        | 0.00146819                           | 0.477278      | 0.000973735                           | 0.000726497                           | 179.968         | 334.797                |
|       | 22             | 4 Weeks        | 0.00148491                           | 0.464362      | 0.00100701                            | 0.00076803                            | 185.793         | 341.016                |
|       |                | <b>Mean</b>    | <b>0.0016</b>                        | <b>0.4531</b> | <b>0.0011</b>                         | <b>0.0008</b>                         | <b>211.8755</b> | <b>365.8485</b>        |
|       | <b>Std Dev</b> | <b>0.0003</b>  | <b>0.0517</b>                        | <b>0.0002</b> | <b>0.0002</b>                         | <b>34.1735</b>                        | <b>59.8962</b>  |                        |
|       | <b>p-value</b> | <b>0.0061</b>  | 0.0764                               | <b>0.0330</b> | 0.0559                                | <b>0.0114</b>                         | <b>0.0005</b>   |                        |

FA: Fractional anisotropy

Data were statistically analyzed using a standard t-test. Statistical analyses were performed comparing groups against their baseline. A p value <0.05 was considered statistically significant.



**Table S23: Individual MRI Data – S1**

| Group | Animal | Time           | Axial-Diffusion (mm <sup>2</sup> /s) | FA (N/A)      | Mean Diffusivity (mm <sup>2</sup> /s) | Radial-Diffusion (mm <sup>2</sup> /s) | STIR-Intensity  | s2neuroT2TFE-Intensity |
|-------|--------|----------------|--------------------------------------|---------------|---------------------------------------|---------------------------------------|-----------------|------------------------|
| 1     | 1      | Baseline       | 0.0011955                            | 0.55935       | 0.000753139                           | 0.000531953                           | 109.41          | 209.57                 |
|       | 2      | Baseline       | 0.00172125                           | 0.467917      | 0.00114881                            | 0.000862576                           | 131.155         | 251.252                |
|       | 13     | Baseline       | 0.00232384                           | 0.353559      | 0.00178701                            | 0.00151858                            | -               | 193.181                |
|       | 14     | Baseline       | 0.0021569                            | 0.384207      | 0.00154465                            | 0.00123854                            | 121.182         | 212.754                |
|       |        | <b>Mean</b>    | <b>0.0018</b>                        | <b>0.4413</b> | <b>0.0013</b>                         | <b>0.0010</b>                         | <b>120.5823</b> | <b>216.6893</b>        |
|       |        | <b>Std Dev</b> | <b>0.0005</b>                        | <b>0.0924</b> | <b>0.0005</b>                         | <b>0.0004</b>                         | <b>10.8849</b>  | <b>24.5858</b>         |
|       |        |                |                                      |               |                                       |                                       |                 |                        |
|       | 1      | 4 Weeks        | 0.00142078                           | 0.543375      | 0.000919433                           | 0.000668729                           | 164.744         | 265.131                |
|       | 2      | 4 Weeks        | 0.00214313                           | 0.416873      | 0.00147262                            | 0.00113735                            | 172.768         | 248.894                |
|       | 13     | 4 Weeks        | 0.0020714                            | 0.353963      | 0.00159736                            | 0.00136031                            | 159.208         | 243.89                 |
|       | 14     | 4 Weeks        | 0.00176136                           | 0.442727      | 0.00123325                            | 0.0009692                             | 165.035         | 214.852                |
|       |        | <b>Mean</b>    | <b>0.0018</b>                        | <b>0.4392</b> | <b>0.0013</b>                         | <b>0.0010</b>                         | <b>165.4388</b> | <b>243.1918</b>        |
|       |        | <b>Std Dev</b> | <b>0.0003</b>                        | <b>0.0788</b> | <b>0.0003</b>                         | <b>0.0003</b>                         | <b>5.5733</b>   | <b>20.9561</b>         |
|       |        | <b>p-value</b> | 0.9992                               | 0.9350        | 0.9865                                | 0.9767                                | <b>0.0081</b>   | 0.1845                 |
|       |        |                |                                      |               |                                       |                                       |                 |                        |
| 5     | 10     | Baseline       | 0.00154917                           | 0.494586      | 0.00100629                            | 0.000734857                           | 135.906         | 269.179                |
|       | 21     | Baseline       | 0.00137954                           | 0.466893      | 0.000939643                           | 0.000719699                           | -               | 228.3                  |
|       | 22     | Baseline       | 0.0013289                            | 0.40992       | 0.000973975                           | 0.00079648                            | 88.1247         | 189.545                |
|       |        | <b>Mean</b>    | <b>0.0014</b>                        | <b>0.4571</b> | <b>0.0010</b>                         | <b>0.0008</b>                         | <b>112.0154</b> | <b>229.0080</b>        |
|       |        | <b>Std Dev</b> | <b>0.0001</b>                        | <b>0.0432</b> | <b>0.0000</b>                         | <b>0.0000</b>                         | <b>33.7865</b>  | <b>39.8217</b>         |
|       |        |                |                                      |               |                                       |                                       |                 |                        |
|       | 9A     | 4 Weeks        | 0.0013591                            | 0.447335      | 0.000926135                           | 0.000709627                           | 169.354         | 278.679                |
|       | 10     | 4 Weeks        | 0.00172692                           | 0.456323      | 0.0011691                             | 0.000890175                           | 180.634         | 358.432                |
|       | 21     | 4 Weeks        | 0.00131021                           | 0.403115      | 0.0009632                             | 0.00078967                            | 140.735         | 293.472                |
|       | 22     | 4 Weeks        | 0.00126738                           | 0.501476      | 0.00085969                            | 0.000655813                           | 141.119         | 251.492                |
|       |        | <b>Mean</b>    | <b>0.0014</b>                        | <b>0.4521</b> | <b>0.0010</b>                         | <b>0.0008</b>                         | <b>157.9605</b> | <b>295.5188</b>        |
|       |        | <b>Std Dev</b> | <b>0.0002</b>                        | <b>0.0403</b> | <b>0.0001</b>                         | <b>0.0001</b>                         | <b>20.2011</b>  | <b>45.4026</b>         |
|       |        | <b>p-value</b> | 0.8649                               | 0.9487        | 0.7922                                | 0.7789                                | 0.0537          | <b>0.0140</b>          |

FA: Fractional anisotropy

Data were statistically analyzed using a standard t-test. Statistical analyses were performed comparing groups against their baseline. A p value <0.05 was considered statistically significant.

**Table S24: Individual MRI Data – Gluteal Muscle (DSC to L4)**

| Group | Animal | Time           | DSC STIR-Intensity | DSC s2neuroT2TFE-Intensity | L3 STIR-Intensity | L3 s2neuroT2TFE-Intensity | L4 STIR-Intensity | L4 s2neuroT2TFE-Intensity |
|-------|--------|----------------|--------------------|----------------------------|-------------------|---------------------------|-------------------|---------------------------|
| 1     | 1      | Baseline       | 3.43437            | 1.48109                    | 3.65137           | 0.806832                  | 2.23331           | 0.808207                  |
|       | 2      | Baseline       | 3.60879            | 1.37875                    | 3.17363           | 0.830246                  | 2.53181           | 0.918291                  |
|       | 13     | Baseline       | -                  | 1.53009                    | -                 | 0.936134                  | -                 | 0.985017                  |
|       | 14     | Baseline       | 3.2428             | 1.40563                    | 4.73498           | 1.06372                   | 3.36314           | 0.983643                  |
|       |        | <b>Mean</b>    | <b>3.4287</b>      | <b>1.4489</b>              | <b>3.8533</b>     | <b>0.9092</b>             | <b>2.7094</b>     | <b>0.9238</b>             |
|       |        | <b>Std Dev</b> | <b>0.1831</b>      | <b>0.0693</b>              | <b>0.8000</b>     | <b>0.1174</b>             | <b>0.5855</b>     | <b>0.0831</b>             |
|       |        |                |                    |                            |                   |                           |                   |                           |
|       | 1      | 4 Weeks        | 3.28416            | 1.28797                    | 2.26336           | 0.796788                  | 2.33803           | 0.865505                  |
|       | 2      | 4 Weeks        | 3.04539            | 1.03978                    | 2.3951            | 0.75427                   | 2.38064           | 0.944656                  |
|       | 13     | 4 Weeks        | 4.12499            | 1.88083                    | 3.51175           | 1.02176                   | 3.32274           | 1.02831                   |
|       | 14     | 4 Weeks        | 2.93215            | 1.36376                    | 3.4079            | 0.988569                  | 2.83095           | 0.927141                  |
|       |        | <b>Mean</b>    | <b>3.3467</b>      | <b>1.3931</b>              | <b>2.8945</b>     | <b>0.8903</b>             | <b>2.7181</b>     | <b>0.9414</b>             |
|       |        | <b>Std Dev</b> | <b>0.5392</b>      | <b>0.3534</b>              | <b>0.6563</b>     | <b>0.1344</b>             | <b>0.4607</b>     | <b>0.0671</b>             |
|       |        | <b>p-value</b> | 0.105              | 0.732                      | <b>0.027</b>      | 0.654                     | 0.407             | 0.539                     |
|       |        |                |                    |                            |                   |                           |                   |                           |
| 5     | 10     | Baseline       | 3.31741            | 0.635745                   | 2.20092           | 0.773837                  | 2.43055           | 0.934481                  |
|       | 21     | Baseline       | -                  | 1.28355                    | -                 | 0.878451                  | -                 | 0.86298                   |
|       | 22     | Baseline       | 4.18192            | 1.4706                     | 3.53705           | 0.868781                  | 2.903             | 0.915927                  |
|       |        | <b>Mean</b>    | <b>3.7497</b>      | <b>1.1300</b>              | <b>2.8690</b>     | <b>0.8404</b>             | <b>2.6668</b>     | <b>0.9045</b>             |
|       |        | <b>Std Dev</b> | <b>0.6113</b>      | <b>0.4381</b>              | <b>0.9448</b>     | <b>0.0578</b>             | <b>0.3341</b>     | <b>0.0371</b>             |
|       |        |                |                    |                            |                   |                           |                   |                           |
|       | 9A     | 4 Weeks        | 3.85957            | 1.51491                    | 3.00896           | 0.95728                   | 3.17679           | 1.11752                   |
|       | 10     | 4 Weeks        | 3.5417             | 1.42865                    | 3.15959           | 0.917294                  | 3.25856           | 1.0467                    |
|       | 21     | 4 Weeks        | 4.79143            | 1.50695                    | 2.51612           | 1.08044                   | 3.1013            | 1.19997                   |
|       | 22     | 4 Weeks        | 3.23813            | 1.16273                    | 2.68475           | 1.09477                   | 2.88031           | 1.14445                   |
|       |        | <b>Mean</b>    | <b>3.8577</b>      | <b>1.4033</b>              | <b>2.8424</b>     | <b>1.0124</b>             | <b>3.1042</b>     | <b>1.1272</b>             |
|       |        | <b>Std Dev</b> | <b>0.6722</b>      | <b>0.1650</b>              | <b>0.2942</b>     | <b>0.0885</b>             | <b>0.1625</b>     | <b>0.0637</b>             |
|       |        | <b>p-value</b> | 0.649              | 0.535                      | 0.963             | <b>0.016</b>              | 0.517             | <b>0.074</b>              |
|       |        |                |                    |                            |                   |                           |                   |                           |

DSC: Dorsal Spinal Cord  
 STIR intensity and S2 neuro intensity normalized to gluteal muscle.  
 Data were statistically analyzed using a standard t-test. Statistical analyses were performed comparing groups against their baseline. A p value <0.05 was considered statistically significant.

**Table S25: Individual MRI Data – Gluteal Muscle (L5 to S1)**

| Group | Animal         | Time           | L5<br>STIR-<br>Intensity | L5<br>s2neuroT2TFE-<br>Intensity | L6<br>STIR-Intensity | L6<br>s2neuroT2TFE-<br>Intensity | S1<br>STIR-<br>Intensity | S1<br>s2neuroT2TFE-<br>Intensity |
|-------|----------------|----------------|--------------------------|----------------------------------|----------------------|----------------------------------|--------------------------|----------------------------------|
| 1     | 1              | Baseline       | 2.16848                  | 0.795463                         | 2.48618              | 0.876876                         | 1.73781                  | 0.542327                         |
|       | 2              | Baseline       | 2.55031                  | 0.935684                         | 2.41781              | 0.921776                         | 2.27758                  | 0.699777                         |
|       | 13             | Baseline       | -                        | 0.957725                         | -                    | 0.893177                         | -                        | 0.631103                         |
|       | 14             | Baseline       | 2.8256                   | 1.10532                          | 2.47619              | 0.941641                         | 2.09484                  | 0.605741                         |
|       |                | <b>Mean</b>    | <b>2.5148</b>            | <b>0.9485</b>                    | <b>2.4601</b>        | <b>0.9084</b>                    | <b>2.0367</b>            | <b>0.6197</b>                    |
|       |                | <b>Std Dev</b> | <b>0.3300</b>            | <b>0.1268</b>                    | <b>0.0369</b>        | <b>0.0289</b>                    | <b>0.2745</b>            | <b>0.0651</b>                    |
|       |                |                |                          |                                  |                      |                                  |                          |                                  |
|       | 1              | 4 Weeks        | 2.86848                  | 0.885639                         | 2.97165              | 0.925261                         | 2.49085                  | 0.689731                         |
|       | 2              | 4 Weeks        | 3.03851                  | 1.04392                          | 2.97084              | 0.981793                         | 2.64385                  | 0.658694                         |
|       | 13             | 4 Weeks        | 3.33212                  | 1.06708                          | 3.25081              | 0.973466                         | 2.67348                  | 0.697397                         |
|       | 14             | 4 Weeks        | 3.08598                  | 1.0953                           | 2.67618              | 0.951062                         | 2.19627                  | 0.611293                         |
|       |                | <b>Mean</b>    | <b>3.0813</b>            | <b>1.0230</b>                    | <b>2.9674</b>        | <b>0.9579</b>                    | <b>2.5011</b>            | <b>0.6643</b>                    |
|       |                | <b>Std Dev</b> | <b>0.1915</b>            | <b>0.0939</b>                    | <b>0.2346</b>        | <b>0.0253</b>                    | <b>0.2184</b>            | <b>0.0391</b>                    |
|       |                | <b>p-value</b> | 0.063                    | <b>0.080</b>                     | 0.062                | <b>0.045</b>                     | 0.164                    | 0.354                            |
|       |                |                |                          |                                  |                      |                                  |                          |                                  |
| 5     | 10             | Baseline       | 2.61358                  | 0.958652                         | 3.17622              | 1.0844                           | 2.4972                   | 0.833875                         |
|       | 21             | Baseline       | -                        | 0.989162                         | -                    | 0.678798                         | -                        | 0.65578                          |
|       | 22             | Baseline       | 2.95529                  | 0.982443                         | 2.13418              | 0.742113                         | 1.67057                  | 0.598358                         |
|       |                | <b>Mean</b>    | <b>2.7844</b>            | <b>0.9768</b>                    | <b>2.6552</b>        | <b>0.8351</b>                    | <b>2.0839</b>            | <b>0.6960</b>                    |
|       |                | <b>Std Dev</b> | <b>0.2416</b>            | <b>0.0160</b>                    | <b>0.7368</b>        | <b>0.2182</b>                    | <b>0.5845</b>            | <b>0.1228</b>                    |
|       |                |                |                          |                                  |                      |                                  |                          |                                  |
|       | 9A             | 4 Weeks        | 4.01846                  | 1.19706                          | 3.85226              | 1.07957                          | 2.79991                  | 0.90601                          |
|       | 10             | 4 Weeks        | 3.31287                  | 1.04462                          | 4.23702              | 1.21103                          | 3.07698                  | 0.95292                          |
|       | 21             | 4 Weeks        | 3.30607                  | 1.18259                          | 2.91573              | 0.997184                         | 2.28009                  | 0.8741                           |
|       | 22             | 4 Weeks        | 2.82072                  | 1.11289                          | 2.63026              | 0.92858                          | 1.99781                  | 0.684808                         |
|       |                | <b>Mean</b>    | <b>3.3645</b>            | <b>1.1343</b>                    | <b>3.4088</b>        | <b>1.0541</b>                    | <b>2.5387</b>            | <b>0.8545</b>                    |
|       |                | <b>Std Dev</b> | <b>0.4931</b>            | <b>0.0702</b>                    | <b>0.7598</b>        | <b>0.1215</b>                    | <b>0.4890</b>            | <b>0.1176</b>                    |
|       | <b>p-value</b> | 0.621          | <b>0.048</b>             | 0.222                            | 0.065                | 0.173                            | <b>0.071</b>             |                                  |

DSC: Dorsal Spinal Cord  
 STIR intensity and S2 neuro intensity normalized to gluteal muscle.  
 Data were statistically analyzed using a standard t-test. Statistical analyses were performed comparing groups against their baseline. A p value <0.05 was considered statistically significant.

A

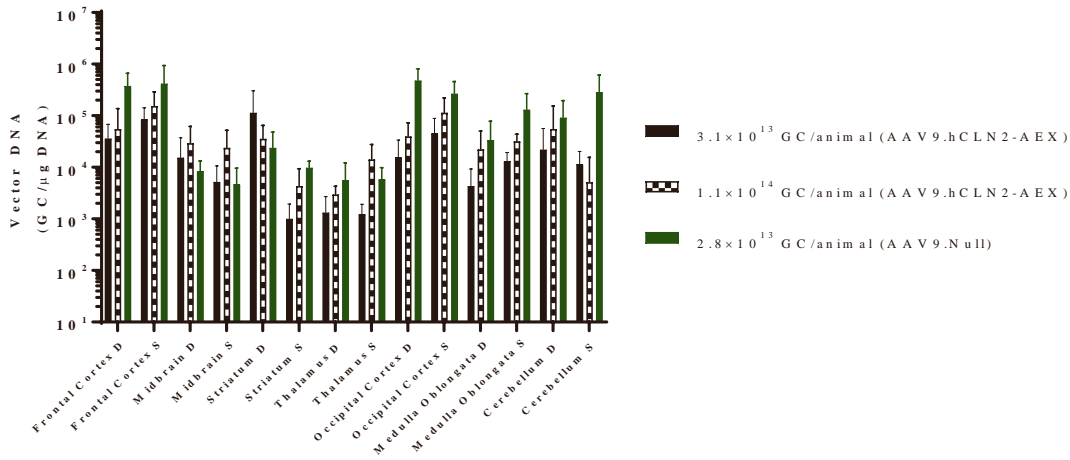

B

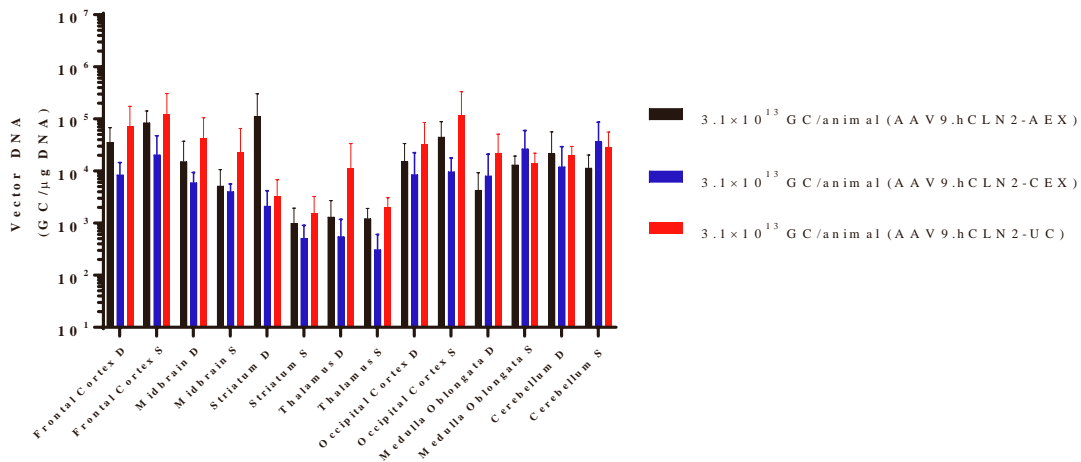

**Figure S1: Biodistribution within deep and superficial layers of the brain with AAV9.hCLN2 or AAV9.Null.** (A) AAV9.hCLN2 at different dose levels alongside AAV9.Null vector and (B) AAV9.hCLN2 prepared by different manufacturing processes. Vector DNA measured by qPCR from 4-mm round samples of frontal cortex, occipital cortex, cerebellum, striatum, medulla oblongata, midbrain and thalamus. One sample from each area was superficial (<3 mm deep) and the other sample from each area was deep (>3 mm deep). Results are shown as averages per group with standard deviations as error bars.

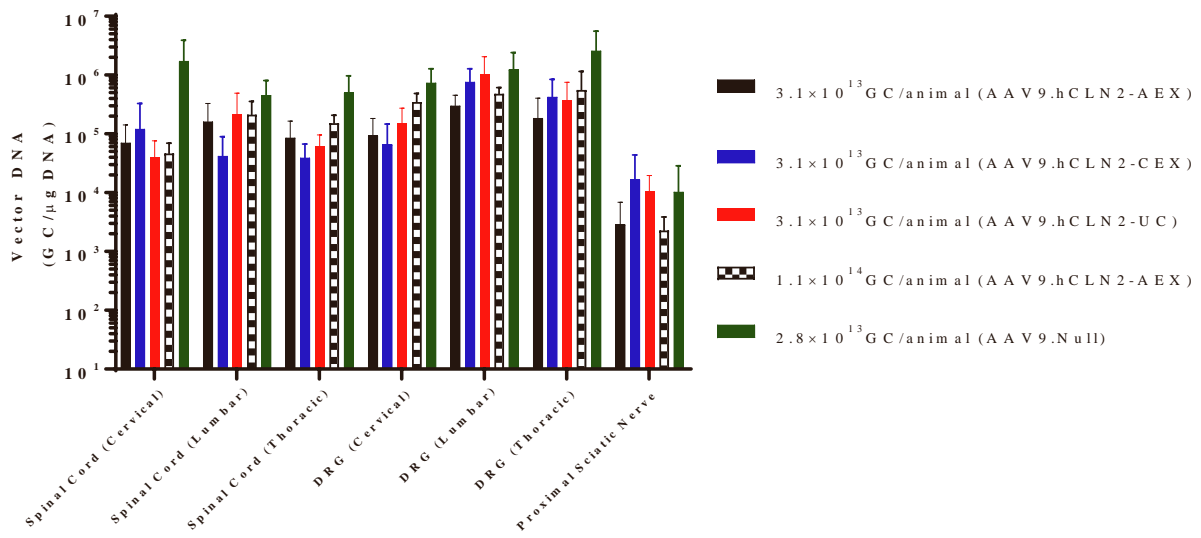

**Figure S2: Biodistribution within spinal cord, DRG and sciatic nerve.** At necropsy, samples of the spinal cord and DRG were collected and vector DNA measured by qPCR. Results are shown as averages per group with standard deviations as error bars.

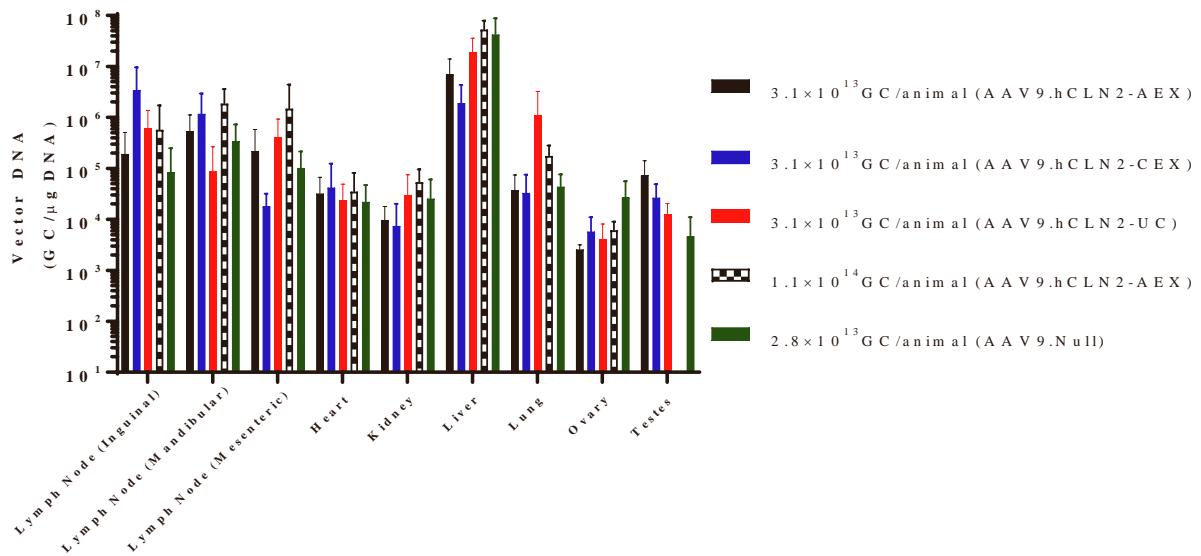

**Figure S3: Biodistribution within peripheral tissue.** At necropsy, samples of tissue were collected and vector DNA measured by qPCR. Results are shown as averages per group with standard deviations as error bars.

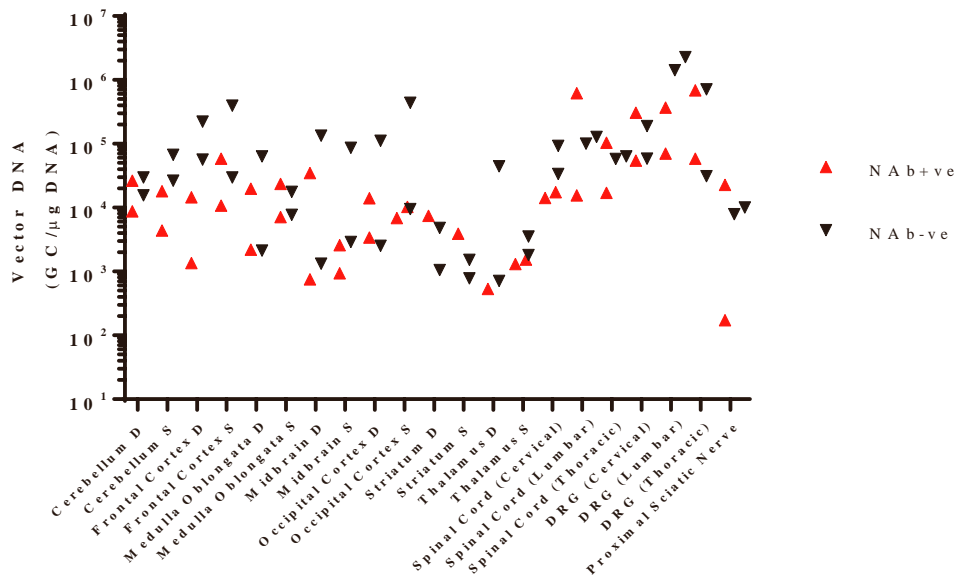

**Figure S4. Comparison of intra-group biodistribution (CNS and PNS) of anti-AAV9 neutralizing antibody (NAb) positive or negative animals administered  $3.1 \times 10^{13}$  GC/animal AAV9.hCLN2-AEX.** At necropsy, samples of tissue were collected and vector DNA measured by qPCR. Results are shown as individual values of two animals that were either NAb positive (titers of 5 and 3) or NAb negative on Day 1 prior to dosing.

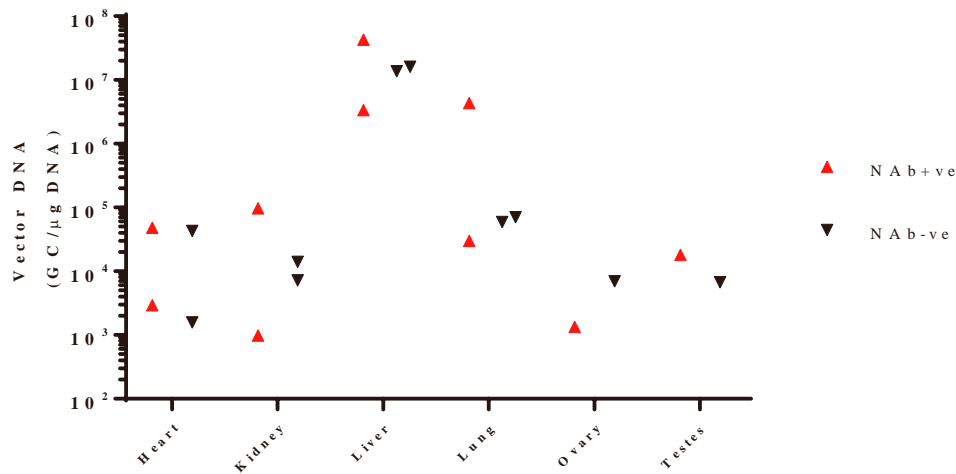

**Figure S5. Comparison of intra-group biodistribution (peripheral) of anti-AAV9 neutralizing antibody (NAb) positive or negative animals administered  $3.1 \times 10^{13}$  GC/animal AAV9.hCLN2-AEX.** At necropsy, samples of tissue were collected and vector DNA measured by qPCR. Results are shown as individual values of two animals that were either NAb positive (titers of 5 and 3) or NAb negative on Day 1 prior to dosing.



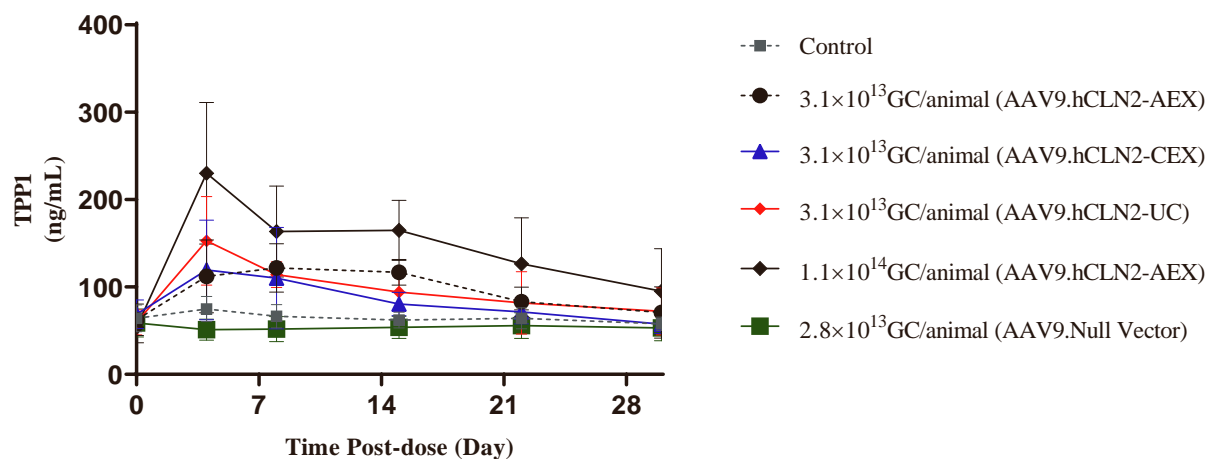

**Figure S6: Serum TPP1 concentrations.** Samples of blood were collected on Days 1 (prior to dosing), 4, 8, 15, 22 and prior to necropsy for serum TPP1 concentration. TPP1 concentration was determined by an electrochemiluminescent (ECL) immunoassay implemented using the Meso Scale Discovery (MSD) platform. Results are shown as averages per group with standard deviations as error bars.

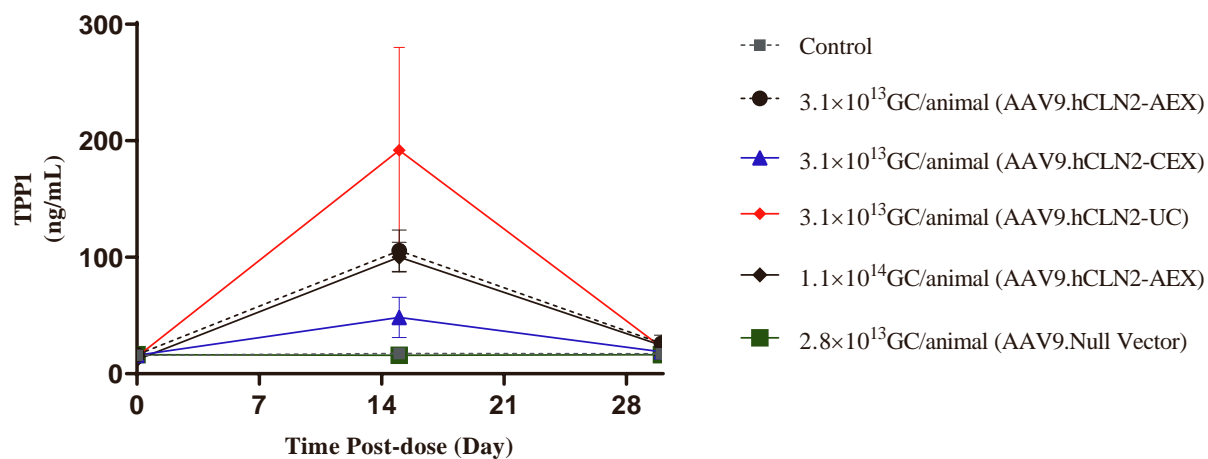

**Figure S7: CSF TPP1 concentrations.** CSF was collected on Days 1 [prior to dosing], 15 and prior to necropsy for TPP1 concentration. TPP1 concentration was determined by an electrochemiluminescent (ECL) immunoassay implemented using the Meso Scale Discovery (MSD) platform.

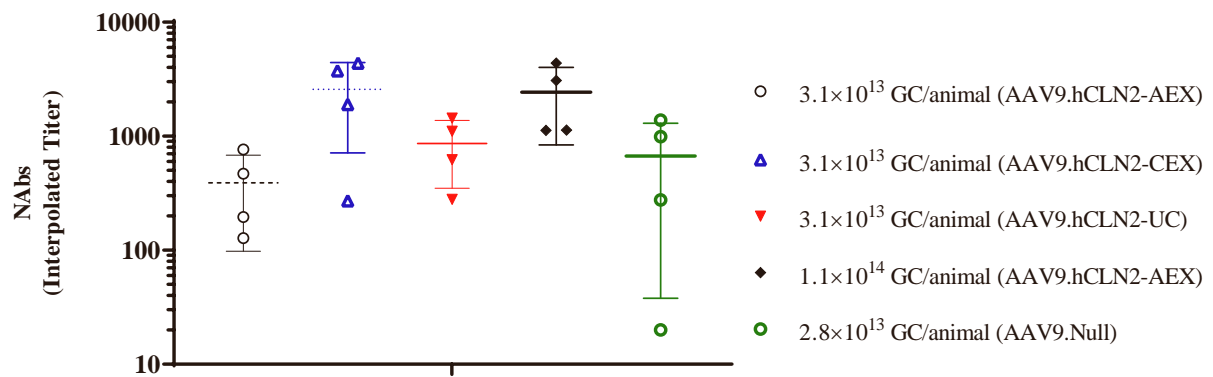

**Figure S8: Serum NAb titers on Day 30.** Serum was collected prior to necropsy to detect the presence of anti-AAV9-neutralizing antibodies (NAbs) using a cell-based method.

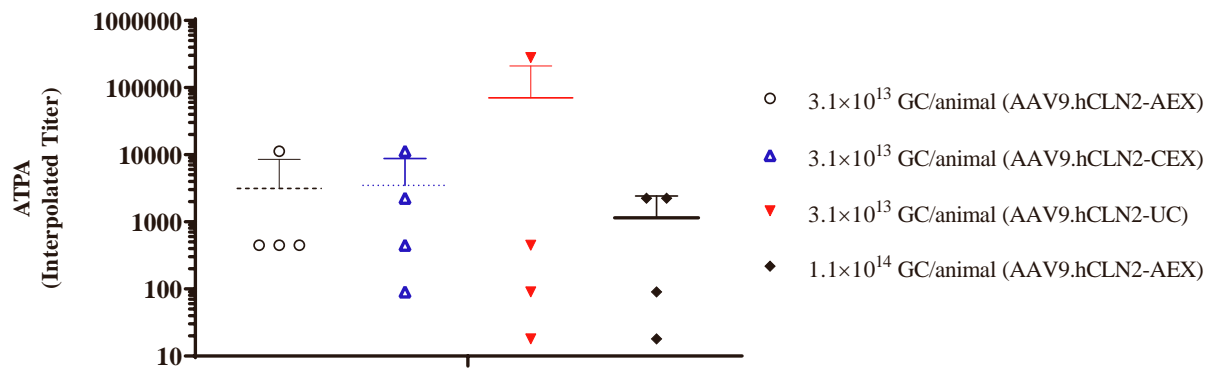

**Figure S9: Serum ATPA titers on Day 30.** Serum was collected prior to necropsy to detect the presence of anti-transgene product antibodies (ATPAs) using a solution bridging ECL immunoassay with the MSD platform.

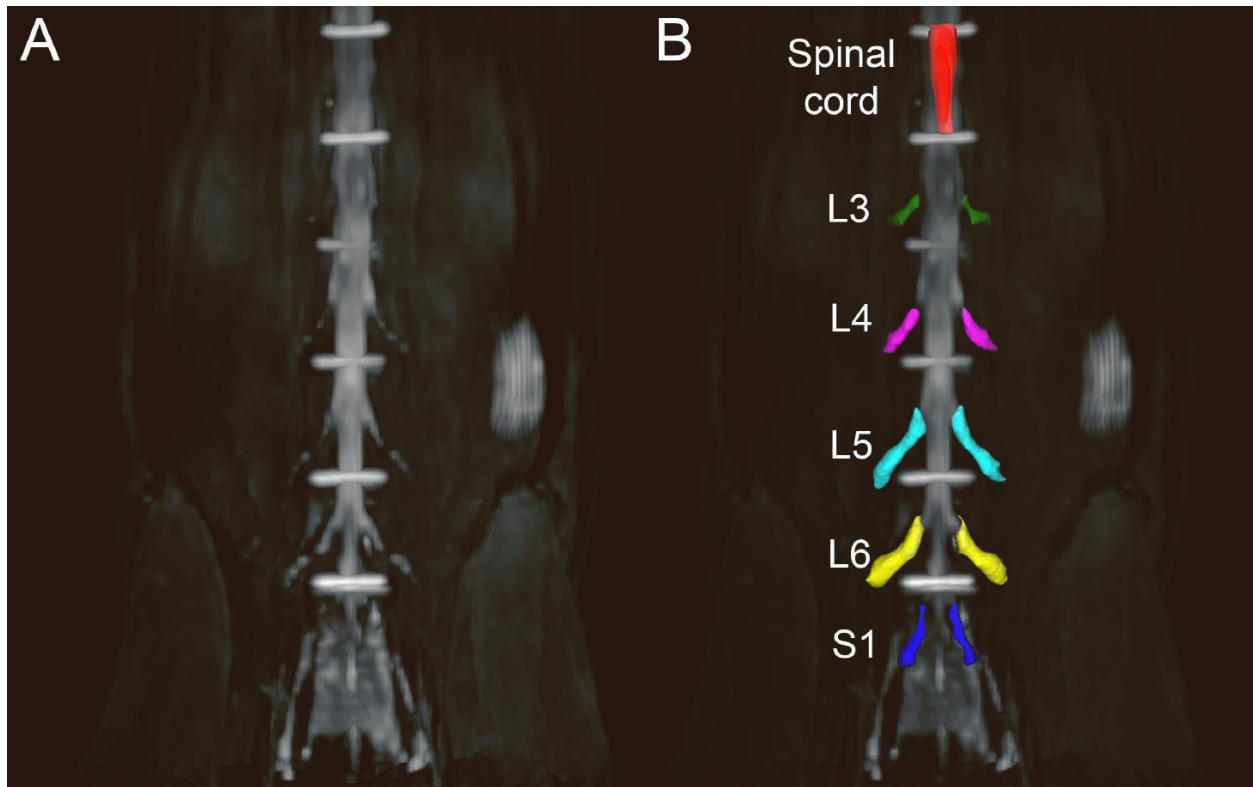

**Figure S10. MRI region of interest (ROI) from L3 to S1.** Dorsal plane maximum intensity projection T2-weighted anatomical images of the lumbosacral spine of a cynomolgus monkey (A) overlain with regions of interest used to measure quantitative results for the L3-S1 spinal nerve pairs and lumbar spinal cord (B).
